# Supplementary material for: How do iLead? Validation of a scale measuring active and passive implementation leadership in Swedish healthcare
Source: PubMed Central journal article supplement — BMJ Open. 2018 Jun 30;8(6):e021992. doi: 10.1136/bmjopen-2018-021992 (PMC6042620; doi:10.1136/bmjopen-2018-021992), 2018-06-30
Supplement: bmjopen-2018-021992.draft_revisions.pdf [file bmjopen-2018-021992.draft_revisions.pdf]

# BMJ Open

BMJ Open is committed to open peer review. As part of this commitment we make the peer review history of every article we publish publicly available.

When an article is published we post the peer reviewers' comments and the authors' responses online. We also post the versions of the paper that were used during peer review. These are the versions that the peer review comments apply to.

The versions of the paper that follow are the versions that were submitted during the peer review process. They are not the versions of record or the final published versions. They should not be cited or distributed as the published version of this manuscript.

BMJ Open is an open access journal and the full, final, typeset and author-corrected version of record of the manuscript is available on our site with no access controls, subscription charges or pay-per-view fees (<http://bmjopen.bmj.com>).

If you have any questions on BMJ Open's open peer review process please email [info.bmjopen@bmj.com](mailto:info.bmjopen@bmj.com)

# BMJ Open

## How do iLead? Validation of a Scale Measuring Active and Passive Implementation Leadership

|                               |                                                                                                                                                                                                                                                                                                                                                                                                                                                                                                                                                                                                                                                                                                                                                                                                                                                                                                                                                                                                                                                                                                       |
|-------------------------------|-------------------------------------------------------------------------------------------------------------------------------------------------------------------------------------------------------------------------------------------------------------------------------------------------------------------------------------------------------------------------------------------------------------------------------------------------------------------------------------------------------------------------------------------------------------------------------------------------------------------------------------------------------------------------------------------------------------------------------------------------------------------------------------------------------------------------------------------------------------------------------------------------------------------------------------------------------------------------------------------------------------------------------------------------------------------------------------------------------|
| Journal:                      | <i>BMJ Open</i>                                                                                                                                                                                                                                                                                                                                                                                                                                                                                                                                                                                                                                                                                                                                                                                                                                                                                                                                                                                                                                                                                       |
| Manuscript ID                 | bmjopen-2018-021992                                                                                                                                                                                                                                                                                                                                                                                                                                                                                                                                                                                                                                                                                                                                                                                                                                                                                                                                                                                                                                                                                   |
| Article Type:                 | Research                                                                                                                                                                                                                                                                                                                                                                                                                                                                                                                                                                                                                                                                                                                                                                                                                                                                                                                                                                                                                                                                                              |
| Date Submitted by the Author: | 30-Jan-2018                                                                                                                                                                                                                                                                                                                                                                                                                                                                                                                                                                                                                                                                                                                                                                                                                                                                                                                                                                                                                                                                                           |
| Complete List of Authors:     | Mosson, Rebecca; Karolinska Institutet, Department of Learning, Informatics, Management and Ethics, Medical Management Centre; Stockholms Lans Landsting, Centre for Epidemiology and Community Medicine, Unit for implementation and evaluation<br>von Thiele Schwarz, Ulrica; Mälardalen University, School of Health, Care and Social Welfare; Karolinska Institutet, Department of Learning, Informatics, Management and Ethics, Medical Management Centre<br>Hasson, Henna ; Karolinska Institutet, Department of Learning, Informatics, Management and Ethics, Medical Management Centre; Stockholms Lans Landsting, Centre for Epidemiology and Community Medicine, Unit for implementation and evaluation<br>Lundmark, Robert; Karolinska Institutet, Department of Learning, Informatics, Management and Ethics, Medical Management Centre<br>Richter, Anne; Karolinska Institutet, Department of Learning, Informatics, Management and Ethics, Medical Management Centre; Stockholms Lans Landsting, Centre for Epidemiology and Community Medicine, Unit for implementation and evaluation |
| Keywords:                     | HEALTH SERVICES ADMINISTRATION & MANAGEMENT, Change management < HEALTH SERVICES ADMINISTRATION & MANAGEMENT, Organisational development < HEALTH SERVICES ADMINISTRATION & MANAGEMENT, Organisation of health services < HEALTH SERVICES ADMINISTRATION & MANAGEMENT, Quality in health care < HEALTH SERVICES ADMINISTRATION & MANAGEMENT                                                                                                                                                                                                                                                                                                                                                                                                                                                                                                                                                                                                                                                                                                                                                           |
|                               |                                                                                                                                                                                                                                                                                                                                                                                                                                                                                                                                                                                                                                                                                                                                                                                                                                                                                                                                                                                                                                                                                                       |

SCHOLARONE™  
Manuscripts

## How do iLead?

### Validation of a Scale Measuring Active and Passive Implementation Leadership

#### Authors

Rebecca Mosson<sup>1,2\*</sup>

Ulrica von Thiele Schwarz<sup>1,3</sup>

Henna Hasson<sup>1,2</sup>

Robert Lundmark<sup>1</sup>

Anne Richter<sup>1,2</sup>

#### Affiliations

<sup>1</sup>Procome research group, Medical Management Centre, Department of Learning, Informatics, Management and Ethics, Karolinska Institutet, 171 77 Stockholm, Sweden

<sup>2</sup>Unit for implementation and evaluation, Centre for Epidemiology and Community Medicine (CES), Stockholm County Council, 171 29, Stockholm, Sweden

<sup>3</sup>School of Health, Care and Social Welfare, Mälardalen University, Box 883, SE 721 23 Västerås, Sweden

#### Author details

**Rebecca Mosson** (\*corresponding author)

<sup>1</sup>Procome research group, Department of Learning, Informatics, Management and Ethics, Medical Management Centre, Karolinska Institutet, SE 171 77, Stockholm, Sweden

<sup>2</sup>Unit for implementation and evaluation, Centre for Epidemiology and Community Medicine, Stockholm County Council, SE 171 29, Stockholm, Sweden

Email: Rebecca.mosson@ki.se

#### Ulrica von Thiele Schwarz

<sup>1</sup>Procome research group, Department of Learning, Informatics, Management and Ethics, Medical Management Centre, Karolinska Institutet, SE 171 77, Stockholm, Sweden

1  
2  
3  
4  
5  
6  
7  
8  
9  
10  
11  
12  
13  
14  
15  
16  
17  
18  
19  
20  
21  
22  
23  
24  
25  
26  
27  
28  
29  
30  
31  
32  
33  
34  
35  
36  
37  
38  
39  
40  
41  
42  
43  
44  
45  
46  
47  
48  
49  
50  
51  
52  
53  
54  
55  
56  
57  
58  
59  
60

36 <sup>3</sup>School of Health, Care and Social Welfare, Mälardalen University, Box 883, SE 721 23 Västerås,  
37 Sweden

38

39 Email: [ulrica.schwarz@ki.se](mailto:ulrica.schwarz@ki.se)

40

#### 41 **Henna Hasson**

42 <sup>1</sup>Procome research group, Department of Learning, Informatics, Management and Ethics, Medical  
43 Management Centre, Karolinska Institutet, SE 171 77, Stockholm, Sweden

44

45 <sup>2</sup>Unit for implementation and evaluation, Centre for Epidemiology and Community Medicine,  
46 Stockholm County Council, SE 171 29, Stockholm, Sweden

47

48 E-mail: [henna.hasson@ki.se](mailto:henna.hasson@ki.se)

49

#### 50 **Robert Lundmark**

51 <sup>1</sup>Procome research group, Department of Learning, Informatics, Management and Ethics, Medical  
52 Management Centre, Karolinska Institutet, SE 171 77, Stockholm, Sweden

53

54 Email: [Robert.lundmark@ki.se](mailto:Robert.lundmark@ki.se)

55

56

#### 57 **Anne Richter**

58 <sup>1</sup>Procome research group, Department of Learning, Informatics, Management and Ethics, Medical  
59 Management Centre, Karolinska Institutet, SE 171 77, Stockholm, Sweden

60

61 <sup>2</sup>Unit for implementation and evaluation, Centre for Epidemiology and Community Medicine,  
62 Stockholm County Council, SE 171 29, Stockholm, Sweden

63

64 Email: [anne.richter@ki.se](mailto:anne.richter@ki.se)

65

66

67

67 **Keywords:** implementation leadership, validation, scale, CFA, Full-Range Leadership Model

68

68 **Word count:** 5361

69

70

71

72

73

74

75

76

## 71 **Abstract**

72 **Objectives:** This validation study aims to describe the creation of a scale – the iLead scale – through  
73 adaptations of existing domain-specific scales that measure active and passive implementation  
74 leadership, and to describe the psychometric properties of this scale.

75 **Methods:** Respondents were 336 healthcare professionals (90% female and 10% male; mean age 47  
76 years) whose first- and second-line managers participated in a transformational leadership intervention  
77 to train healthcare managers in implementation leadership. This was performed in the Stockholm  
78 regional healthcare organization that offer primary, psychiatric, rehabilitation, and acute hospital care,  
79 among other areas. The items for measuring implementation leadership were based on extant research  
80 and the Full-Range Leadership Model. Confirmatory factor analysis was performed to evaluate the  
81 dimensionality of the scale, followed by tests for reliability and convergent, discriminant and criterion-  
82 related validity using correlations and multilevel regression analyses.

83 **Results:** The final scale consists of 16 items clustered into four subscales representing active  
84 implementation leadership, and one scale signifying passive implementation leadership. Findings  
85 showed that the hypothesized model had an acceptable model fit ( $\chi^2_{(99)}=382.864^{**}$ , CFI=.935,  
86 TLI=.911, RMSEA=.059). The internal consistency and convergent, discriminant and criterion-related  
87 validity were all satisfactory.

88 **Conclusions:** The iLead scale is a valid measure of implementation leadership and is a tool for  
89 understanding how active and passive leader behaviours influence an implementation process. This  
90 brief scale may be particularly valuable to apply in training focusing on facilitating implementation,  
91 and in evaluating leader training. Moreover, the scale can be useful in evaluating various leader  
92 behaviours associated with implementation success or failure.

## 94 **Strengths and limitations of this study**

- 1  
2  
3 95 • This study explored the factor structure, reliability and validity of the iLead scale – the first  
4 96 scale that assesses both active and passive implementation-specific leadership based on the  
5 97 Full Range Leadership Model.  
6  
7  
8 98 • The iLead scale is a brief and pragmatic scale that can be used in trainings focusing on  
9 99 facilitating implementation, in clinical practice to assess implementation leadership in order to  
10 100 improve implementation processes in the daily practice as well as in healthcare research.  
11  
12  
13  
14 101 • A confirmatory factor analysis (CFA) was performed to confirm the factor structure since the  
15 102 iLead scale was based on theory and established scales, in addition to tests concerning  
16 103 reliability and validity.  
17  
18  
19  
20 104 • The *active management-by-exception* factor of the Full Range Leadership Model was  
21 105 excluded from the iLead scale since the objective was to only incorporate leader behaviours  
22 106 that can be clearly distinguished into an overall active or passive implementation leadership  
23 107 category.  
24  
25  
26  
27  
28 108 • The number of items in each sub-scale differed based on results from the validation process,  
29 109 where items that did not capture the intended construct or had low correlations were excluded.  
30  
31  
32  
33  
34 110  
35  
36  
37 111

## 112 **Introduction**

113 Implementing change in healthcare is a complex and challenging task.<sup>1,2</sup> Nonetheless, this effort is  
114 essential for keeping healthcare professionals up to date on, and ensuring their use of new research  
115 evidence so patients can receive the best possible care. Researchers have identified a wide range of  
116 contextual factors that influence effective implementation,<sup>3-5</sup> one of which is leadership.<sup>6-8</sup>  
117 Managers' attitudes regarding, and behaviours during, an implementation are crucial for effectively  
118 achieving change in practice. This is particularly true for line managers (i.e. those with a managerial  
119 position closest to employees) who have a direct influence on employees' implementation

1  
2  
3 120 behaviours.<sup>9,10</sup> Research has recognized managerial and leader behaviours that influence an  
4  
5 121 implementation process as being supportive, providing feedback, communicating clearly, being a role  
6  
7 122 model, encouraging employee development, and creating a context conforming to the implementation,  
8  
9 123 for instance by providing resources.<sup>7,11-13</sup> However, this research has seldom relied on leadership  
10  
11 124 theory to study the quality of the actions leaders take; this despite a long history of theoretical  
12  
13 125 leadership research in multiple disciplines.<sup>14</sup> Leadership theory can facilitate the understanding of both  
14  
15 126 what managers do (e.g. provide information about the implementation) and how these actions are  
16  
17 127 performed (e.g. if the information is provided in a way that inspires employees), thereby explaining  
18  
19 128 the relationship between leadership and implementation outcomes. The scale validated in this study  
20  
21 129 focuses on capturing line managers' implementation-specific leader behaviours – both what they do  
22  
23 130 and how these actions are performed – based on the active and passive dimensions of the Full-Range  
24  
25 131 Leadership Model.

132

### 133 **The Full-Range Leadership Model**

134 The Full-Range Leadership Model (FRLM) is the most comprehensively researched approach to  
135 leadership.<sup>15-18</sup> The model clusters leader behaviours into two broad dimensions signifying active and  
136 passive leadership.<sup>18-21</sup> Transformational leadership is one factor of active leadership<sup>18,21</sup> and is  
137 associated with beneficial individual and organizational outcomes,<sup>22</sup> employee performance,<sup>23</sup> the  
138 change process<sup>24,25</sup> and organizational innovation<sup>26</sup> in various contexts and cultures.<sup>27</sup> There is also  
139 emerging evidence on the positive relationship between transformational leadership and effective  
140 implementation.<sup>10</sup> For instance, transformational leader behaviours have been strongly related to  
141 employees' innovation implementation behaviour<sup>28</sup> and their commitment to change.<sup>29</sup>  
142 Transformational leaders inspire employees to achieve higher goals and to perform at a higher level  
143 than expected. These leader behaviours were originally divided into three sub-factors: *idealized*  
144 *influence*, acting as a role model and building relationships with employees based on trust and respect;  
145 *individualized consideration*, coaching of staff and helping them develop, while conveying empathy  
146 for their needs and desires; and *intellectual stimulation*, encouraging employees to be creative and to

1  
2  
3 147 challenge assumptions.<sup>21</sup> *Inspirational motivation* was later added as another sub-factor to  
4  
5 148 transformational leadership.<sup>30,31</sup> This sub-factor concerns articulating a clear and compelling vision to  
6  
7 149 employees and motivating them to achieve set goals.<sup>31</sup> It has been argued that these four  
8  
9 150 transformational leadership sub-factors are related, however it has proved problematic to distinguish  
10  
11 151 between them,<sup>18,31</sup> mainly through difficulties in empirically supporting discriminant validity (i.e. high  
12  
13 152 intercorrelations between the sub-factors).<sup>19,30,32,33</sup> Consequently, different approaches to conceptualize  
14  
15 153 and measure transformational leadership has been adopted. Some have measured it as a global  
16  
17 154 construct,<sup>26,33</sup> whereas others have examined all individual sub-factors of transformational  
18  
19 155 leadership.<sup>34,35</sup> Yet others have used a reduced set of factors.<sup>36</sup> It has been especially difficult to  
20  
21 156 distinguish between *idealized influence* and *inspirational motivation*, both conceptually<sup>18,37</sup> and  
22  
23 157 empirically.<sup>19,31,38</sup> Thus, some have combined *idealized influence* and *inspirational motivation* into one  
24  
25 158 sub-factor.<sup>22,30,38-40</sup>

26  
27 159  
28  
29 160 Another dimension of active leadership is *contingent reward*.<sup>19,21</sup> This sub-factor is the most active  
30  
31 161 form of transactional leadership and involves an exchange relationship between manager and  
32  
33 162 employees, for instance setting mutually agreed-upon goals and linking them to rewards. Contingent  
34  
35 163 reward behaviours have been linked to employees' performance outcomes<sup>23</sup> and satisfaction.<sup>19</sup> Current  
36  
37 164 suggestions are that a combination of transformational leadership and contingent reward is most  
38  
39 165 effective in producing positive organizational outcomes.<sup>16,23,37,41</sup> Based on this, contingent reward is  
40  
41 166 likely to be an important component of active implementation leadership.

42  
43 167  
44  
45 168 Passive leadership includes two dimensions.<sup>18,20,21</sup> One of these is *passive management-by-exception*, a  
46  
47 169 sub-factor of transactional leadership.<sup>20,42</sup> This refers to manager behaviours related to acting first  
48  
49 170 when something has gone wrong, or correcting employee actions when these have been brought to  
50  
51 171 their attention. This sub-factor has been shown to be ineffective in achieving organizational outcomes,  
52  
53 172 such as safety at work,<sup>20</sup> and to negatively impact performance.<sup>23</sup> The other passive leadership  
54  
55 173 dimension is *laissez-faire leadership*, leaders abdicate responsibility and avoid taking initiative.<sup>18</sup> This



1  
2  
3 174 type of non-leadership is also ineffective for achieving positive outcomes,<sup>16,20</sup> and is an overall  
4  
5 175 destructive leader behaviour.<sup>43</sup> *Passive management-by-exception* and *laissez-faire leadership* have  
6  
7 176 been combined in previous studies to represent a generalized passive leadership construct.<sup>18,20,27,42</sup>  
8  
9 177 These behaviours are typically highly correlated with each other and related to negative employee and  
10  
11 178 organizational outcomes, and negatively associated with active leadership.

12  
13 179 An additional sub-factor of the transactional leadership construct is *active management-by-exception*.<sup>42</sup>  
14  
15 180 This type of leader behaviour, added to later versions of the FRLM, is characterized in terms of  
16  
17 181 monitoring for and detecting mistakes that deviate from the norm, and taking corrective action when  
18  
19 182 errors occur.<sup>18,30</sup> There is an ongoing discussion as to whether *active management-by-exception* fits  
20  
21 183 into the passive or the active categories of leadership<sup>42</sup> or should be represented separately.<sup>41</sup> Some  
22  
23 184 have shown that *active* and *passive management-by-exception* are separate constructs that are either  
24  
25 185 uncorrelated, or somewhat negatively correlated.<sup>18,42</sup> Thus, *active management-by-exception* can be  
26  
27 186 argued to be an active way of managing in comparison to the passive leader dimensions. However, in  
28  
29 187 comparison to the active leadership dimensions, *active management-by-exception* is more reactive  
30  
31 188 than proactive and cannot be considered an effective leadership style. Consequently, due to this  
32  
33 189 unclear positioning to either the active or the passive leadership dimensions on the FRLM continuum,  
34  
35 190 *active management-by-exception* was not included in this study.

36  
37  
38 191

39  
40 192 To date, leadership research has mostly focused on measuring active leader behaviours to identify  
41  
42 193 which ones are effective and positively influence organizational outcomes. However, capturing  
43  
44 194 passive leader behaviours that negatively influence employees is also of great importance, as these can  
45  
46 195 have disastrous consequences<sup>20,43,44</sup> and will most likely influence the implementation process. The  
47  
48 196 research on implementation leadership has hitherto emphasized behaviours that are effective for  
49  
50 197 implementing change, naturally, since these are needed to achieve implementation success. However,  
51  
52 198 it is also important to consider and measure leader behaviours that may be disruptive to, and hinder, an  
53  
54 199 implementation process. This is important, since the way managers lead an implementation can  
55  
56 200 influence the implementation climate both positively and negatively<sup>20,45</sup>. Implementation climate

1  
2  
3 201 involves employees' shared perceptions of an implementation initiative's practical value.<sup>46</sup> Research  
4  
5 202 has demonstrated the relevance of implementation climate for the association between  
6  
7 203 transformational leadership and employees' commitment to change.<sup>28</sup> Moreover, active leadership may  
8  
9 204 also promote a positive implementation climate,<sup>47,48</sup> and thus influence implementation success. This  
10  
11 205 highlights the importance of capturing both the active and passive aspects of leadership.<sup>18,20</sup>  
12

13 206

### 16 207 **Implementation-Specific Leadership**

18 208 Recent research on leadership has indicated that leader behaviours directed at a particular initiative or  
19  
20 209 objective, often referred to as domain-specific leadership,<sup>20,49,50</sup> appear to be more effective than  
21  
22 210 general leader behaviours for reaching the goals of this initiative. Consequently, general active leader  
23  
24 211 behaviours do not seem to be sufficient for affecting a specific domain. In the areas of occupational  
25  
26 212 safety<sup>51</sup>, employee health and well-being<sup>52</sup> and service climate,<sup>50</sup> this has led to the development of  
27  
28 213 domain-specific FRLM-scales. Several of these scales build on the theory of the FRLM, however  
29  
30 214 specifically ask the rater to consider leader behaviours in relation to a specific domain. When  
31  
32 215 implementing changes in the healthcare context, this might mean that leader behaviours directed at a  
33  
34 216 specific implementation initiative might be necessary for the success of the implementation process,  
35  
36 217 rather than expecting general active leadership to have an impact. Hence, general leadership may  
37  
38 218 foster a good work environment and performance overall, but may be insufficient for fostering  
39  
40 219 implementation success for a specific evidence-based method to improve the delivery of healthcare. It  
41  
42 220 is therefore necessary to measure leader behaviours specific to an implementation process. This also  
43  
44 221 means that although there is a variety of theory-based scales that measure general leadership,<sup>53</sup> these  
45  
46 222 may not effectively predict the outcomes of an implementation process.<sup>54,55</sup>  
47

48  
49 223

51 224 To date, there is one implementation-specific leadership scale:<sup>56</sup> the Implementation Leadership Scale  
52  
53 225 (ILS) measures strategic leadership in the implementation of evidence-based practices (EBPs), and  
54  
55 226 assesses active leader behaviours that promote implementation of EBPs.<sup>56</sup> We argue for three main  
56  
57

1  
2  
3 227 reasons to construct a new scale to measure implementation leadership. First, no scale currently exists  
4  
5 228 that measures active and passive leader behaviours in relation to implementation. This is an important  
6  
7 229 aspect to be included in an implementation leadership scale since passive leader behaviours can have  
8  
9 230 detrimental effects on employees,<sup>20,23</sup> and consequently also for an implementation process. Second,  
10  
11 231 although Aarons et al. (2014) considered the active leader behaviours of the FRLM when developing  
12  
13 232 the ILS,<sup>56</sup> the aim was to assess independent and different aspects of implementation leadership. Thus,  
14  
15 233 at present, no implementation leadership scale exists that operationalize the FRLM theory. We suggest  
16  
17 234 that a scale measuring implementation leadership and maintains the FRLM structure is important for  
18  
19 235 obtaining more detailed information about leader behaviours.<sup>35</sup> Third, the ILS focuses on what  
20  
21 236 managers do when leading implementation (e.g. developing a plan to facilitate the process) than how it  
22  
23 237 is done (e.g. whether these tasks have been performed in a way that inspires employees). We suggest  
24  
25 238 that an implementation leadership scale that, in addition to measuring what, measures how managers  
26  
27 239 lead implementation is valuable for managers in their development as an implementation leader.

28  
29 240

30  
31 241 In conclusion, the aim of this study is to adapt previous domain-specific scales<sup>20,57</sup> to create an active  
32  
33 242 and passive implementation-specific leadership scale that follows the factor structure of the FRLM,  
34  
35 243 and to validate this scale. The objective of the iLead scale is to complement a previous implementation  
36  
37 244 leadership scale (ILS) by capturing both effective and disruptive implementation leader behaviours by  
38  
39 245 basing the scale on the active and passive dimensions of the FRLM, and to capture what leaders do in  
40  
41 246 addition to how they perform these behaviours. Four subscales are predicted for active implementation  
42  
43 247 leadership and one subscale for passive implementation leadership.

44  
45  
46 248

## 47 48 49 249 **Methods**

50  
51  
52 250

### 53 54 55 251 **Adapting previous domain-specific scales to construct the iLead scale**

1  
2  
3 252 As a first step, a literature search was performed to identify key research relating to implementation  
4  
5 253 leadership, including previously validated scales. This informed the decision that the scale should  
6  
7 254 follow the factor structure of the FRLM, thus including both active and passive leader behaviours, and  
8  
9 255 be adapted from existing scales. The basis for the construction of the iLead scale was two validated  
10  
11 256 domain-specific leadership scales.<sup>20,49</sup> We adapted the items from the scale developed by Kelloway et  
12  
13 257 al. (2006),<sup>20</sup> which measures transformational and passive safety leadership and follows the factor  
14  
15 258 structure of the FRLM, to be implementation specific. For instance, the original item ‘My manager  
16  
17 259 shows determination to maintain a safe work environment’ was adapted to ‘My manager has shown  
18  
19 260 determination to maintain the implementation of *the new working method*’. We complemented this  
20  
21 261 with the subscale ‘line managers’ attitudes and actions’ from the Intervention Process Measure (IPM)  
22  
23 262 by Randall et al. (2009).<sup>57</sup> This scale specifically focuses on managerial behaviours in relation to  
24  
25 263 occupational health interventions and is one of the few widely used scales attempting to tap into  
26  
27 264 change leadership. The items were adapted slightly to be applicable for the implementation area (see  
28  
29 265 Supplementary appendix 1 for the original and adapted items). This process resulted in a 20-item scale  
30  
31 266 assessing implementation-specific leadership.

32  
33 267

34  
35 268 The iLead scale was developed as a part of an implementation leadership training intervention (the  
36  
37 269 iLead intervention<sup>58</sup>). It was used as a tool to provide feedback for managers on their leader  
38  
39 270 behaviours. It was therefore important that the scale could distinguish between different types of active  
40  
41 271 and passive leader behaviours, as previously suggested.<sup>32,35</sup> Hence, a differentiation between the  
42  
43 272 factors was sought. Although idealized influence and inspirational motivation may be argued to be  
44  
45 273 conceptually different,<sup>37,40</sup> studies have not been able to consistently empirically separate these sub-  
46  
47 274 factors.<sup>39,40</sup> Therefore, idealized influence and inspirational motivation were combined and named  
48  
49 275 ‘*exemplary behaviours*’, which is in line with previous studies using the FRLM.<sup>30,36,38</sup> Consequently,  
50  
51 276 the iLead scale measures active implementation leadership, from here on referred to as active  
52  
53 277 leadership, through four subscales – the *exemplary behaviours* (7 items), *individualized consideration*  
54  
55 278 (3 items), *intellectual stimulation* (5 items) and *contingent reward* (2 items). Passive implementation

1  
2  
3 279 leadership, from here on referred to as passive leadership, comprises elements from both *passive*  
4 280 *management-by-exception* and *laissez-faire* leader behaviours (3 items), in line with a previous scale  
5  
6 281 measuring domain-specific leadership.<sup>20</sup>  
7  
8  
9 282

### 11 283 **Assurance of content validity**

14 284 In addition to basing the iLead items on existing scales, two additional approaches were used to assure  
15  
16 285 content validity.<sup>59</sup> National experts in the field of leadership and implementation (n=5) and managers  
17  
18 286 in a healthcare organization (n=40) were invited to a workshop to identify crucial implementation  
19  
20 287 leader behaviours. A structured process – Co-created program theory (COP) – was used.<sup>60</sup> The first  
21  
22 288 step was to individually brainstorm leader behaviours perceived as important in implementation.  
23  
24 289 Thereafter the participants categorized these behaviours into overall themes. Examples of themes  
25  
26 290 were: ‘inspire and motivate employees’ and ‘be responsive to employees’ needs’. Third, to test the  
27  
28 291 face validity of the scale,<sup>59</sup> employees and senior managers (n=11) representing the healthcare  
29  
30 292 organizations completed a draft of the questionnaire and were asked for oral feedback on whether the  
31  
32 293 items were clearly formulated, relevant and understandable, and if they perceived that the scale  
33  
34 294 measured the construct it aimed to measure. This did not lead to any major changes to the items.  
35

36  
37 295

### 39 296 **Participants**

41  
42 297 The data for the present study was collected as part of a larger trial in which an implementation  
43  
44 298 leadership training intervention was developed and evaluated in the Stockholm regional healthcare  
45  
46 299 organization.<sup>58</sup> This organization offers primary, psychiatric, rehabilitation, and acute hospital care,  
47  
48 300 among other areas. The data used in the present study originates from the baseline measurement (Time  
49  
50 301 1), conducted in November/December 2015, with the exception of one scale collected from the first  
51  
52 302 follow-up (Time 2) in May/June 2016 to assess predictive criterion validity. All employees whose  
53  
54 303 managers were taking part in the intervention and who were not on leave of absence, parental leave,  
55  
56 304 had quit their job, etc. were invited to participate in the study. Employee data was used since

1  
2  
3 305 managers' self-ratings are often inflated due to leniency bias,<sup>61,62</sup> and previous studies have  
4  
5 306 demonstrated the validity of using employees' assessments of leader behaviours.<sup>63,64</sup> Out of 1,084  
6  
7 307 eligible healthcare professionals, 815 responded (75% response rate) to the baseline measurement  
8  
9 308 (Time 1). Of these, 336 respondents (41%) answered the iLead scale. The reason why there were  
10  
11 309 fewer employees eligible to answer the questionnaire was that a filter was included at the beginning of  
12  
13 310 the questionnaire to ensure that only respondents who could remember a specific implementation, and  
14  
15 311 thus respond to questions about their manager's implementation leadership, answered the iLead scale  
16  
17 312 questions. Through the filter, respondents received instructions to reflect on an implementation their  
18  
19 313 manager had led during the past six months, which they also had to identify in the questionnaire.  
20  
21 314 Subsequently, only those respondents who could identify an implementation answered the iLead  
22  
23 315 questionnaire, and were instructed to replace the phrase '*the new working method*' in each question of  
24  
25 316 the iLead scale with the implementation they had identified in the filter question.

26  
27 317

28  
29  
30 318 The follow-up measurement was performed immediately after the implementation leadership training  
31  
32 319 intervention (Time 2),<sup>58</sup> six months after the baseline measurement. The purpose of using data at Time  
33  
34 320 2 was to assess the predictive type of criterion validity (i.e. using a criterion that occurs in the  
35  
36 321 future).<sup>59</sup> Thus, data on implementation climate was used since active leadership is an important  
37  
38 322 predictor of a positive implementation climate.<sup>46,48</sup> A total of 490 respondents answered the  
39  
40 323 questionnaire at Time 2, and 443 (90%) of these answered all the implementation climate items.

41  
42 324

43  
44  
45 325 The majority of respondents were female (90%) and had worked at their current job for two to five  
46  
47 326 years (26.8 %). This is representative of the healthcare context in Sweden.<sup>65</sup> The participants' mean  
48  
49 327 age was 47 years (SD=11.8; Range: 22 – 65). Most participants, 79.6%, had obtained a university  
50  
51 328 degree; 18.7% had a college degree; and 1.7% had no further education, i.e. lower than a college  
52  
53 329 degree.

54  
55 330

1  
2  
3 331 **Procedure**  
4

5 332 The respondents received a secured link to an electronic questionnaire through their work e-mail,  
6  
7 333 including information about the study and the purpose of the questionnaire. Two reminders were sent,  
8  
9 334 with a two-week time interval. All participants provided informed consent that their data could be used  
10  
11 335 in research, and confirmed that they understood that participation was voluntary and that they could  
12  
13 336 withdraw their participation at any time. The local ethics committee in Stockholm (ref no. 2015/857-  
14  
15 337 31/5) approved the data collection for the project.  
16  
17

18 338

19  
20 339 **Measures**

21  
22 340 *Implementation-specific active and passive leadership* was measured through the iLead scale  
23  
24 341 (described above). All 20 items were scored on a 1 (strongly disagree) to 5 (strongly agree) Likert  
25  
26 342 scale.  
27

28 343

29  
30 344 *Convergent and discriminant validity measures*

31  
32  
33 345 *General transformational leadership* was measured through the Global Transformational Leadership  
34  
35 346 (GTL) scale<sup>33</sup> using seven items. An example item is: ‘My closest manager communicates a clear and  
36  
37 347 positive vision of the future’. Items were scored on a 1 (strongly disagree) to 5 (strongly agree) Likert  
38  
39 348 scale. Cronbach’s alpha was .95.  
40

41 349

42  
43  
44 350 *General transactional leadership* was measured through two items used in previous research that are  
45  
46 351 based on the Multifactor Leadership Questionnaire (MLQ), modified to be implementation-  
47  
48 352 specific.<sup>18,20</sup> The items focus on contingent reward behaviours, for example: “My manager shows  
49  
50 353 satisfaction when employees meet expectations”. Items were scored on a 1 (strongly disagree) to 5  
51  
52 354 (strongly agree) Likert scale. Cronbach’s alpha was .81.  
53

54  
55 355  
56  
57  
58  
59  
60

1  
2  
3 356 *Criterion-related validity measure*  
4

5 357 *Implementation climate* was measured with three items derived from the subscale ‘Focus on EBP’ of  
6  
7 358 the Implementation Climate Scale (ICS)<sup>46</sup> (collected at Time 2). These items were deemed relevant for  
8  
9 359 assessing implementation climate due to their specific nature, and were therefore adapted to the  
10  
11 360 present study. For example, “Using evidence-based practices is a top priority in this team/agency” was  
12  
13 361 changed to “At my workplace it is a top priority to change our working methods in order to achieve  
14  
15 362 the best possible quality”. Items were scored on a 1 (strongly disagree) to 5 (strongly agree) Likert  
16  
17 363 scale. Cronbach’s alpha was .86.  
18

19  
20 364

### 21 365 **Statistical analyses**

22  
23  
24 366 Two major approaches were used to validate the scale.<sup>59</sup> Its dimensionality was evaluated through  
25  
26 367 confirmatory factor analysis (CFA) using AMOS 23. CFA was chosen over an exploratory factor  
27  
28 368 analysis (EFA) since the factor structure of the implementation-specific scale (i.e. FRLM) is well  
29  
30 369 established in the literature and has prior validity evidence.<sup>19,30,66,67</sup> This is also in line with previous  
31  
32 370 studies of domain-specific scales based on the FRLM.<sup>20</sup> Thus, CFA is used to deductively confirm that  
33  
34 371 the data in the present study fits into the already proposed factor structure, whereas an EFA is more  
35  
36 372 inductive in its approach and should be used when developing new scales with items that have not  
37  
38 373 been tested in terms of reliability and validity.<sup>68</sup> The maximum likelihood estimation (ML) approach  
39  
40 374 was used to address missing data values.<sup>69</sup> One path indicator for each latent variable was fixed to set  
41  
42 375 the scale of the latent variable. Model fit was assessed using several fit indices, including the chi-  
43  
44 376 square ( $\chi^2$ ), the comparative fit index (CFI), the Tucker-Lewis index (TLI), and the root mean square  
45  
46 377 error residual (RMSEA).<sup>69,70</sup> The following approximate cut-off criteria were used, whereby CFI and  
47  
48 378 TLI around .90<sup>69</sup> and a RMSEA value of  $\leq .06$ <sup>70</sup> indicate a good fit to the data<sup>71</sup>. Information criteria  
49  
50 379 such as the Akaike information criterion (AIC) and the chi-square difference test were used for model  
51  
52 380 comparison, whereby a model with a lower value indicates a more acceptable model fit.<sup>69</sup>  
53

54  
55 381  
56  
57  
58  
59  
60



1  
2  
3 382 First, item characteristics, such as comments from participants or factor loadings, were considered to  
4  
5 383 identify items for exclusion. Following this, five competing models were compared to test the  
6  
7 384 hypothesized factor structure of the scale.<sup>69,72</sup> In line with previous research, a second-order factor  
8  
9 385 model is proposed for the active implementation leadership factors due to high factor  
10  
11 386 correlations.<sup>18,33,38</sup> The chi-square difference test was used to identify the best fitting model. Moreover,  
12  
13 387 additional rigorous tests were performed by analysing a bifactor model to partition the variance of the  
14  
15 388 multidimensional scales. Findings from the bifactor model were in line with the results from the CFA  
16  
17 389 (see online Supplementary appendix 2 for analysis procedure and findings).

18  
19 390

20  
21 391  
22 392 Second, the reliability of each subscale was assessed via internal consistency (Cronbach's alpha).<sup>59</sup>  
23  
24 393 Convergent validity of implementation leadership was then analysed. Here, our scale was correlated  
25  
26 394 with theoretically similar instruments,<sup>59,72</sup> such as general transformational<sup>33</sup> and transactional  
27  
28 395 leadership.<sup>18</sup> Correlations should be higher than .40.<sup>73</sup> Discriminant validity was tested through the  
29  
30 396 correlation of passive implementation leadership with general transformational and transactional  
31  
32 397 leadership. For this, passive leadership was correlated with two constructs to which it should be  
33  
34 398 negatively related.<sup>59</sup> Lastly, the criterion-related validity<sup>59,72</sup> was examined by performing regression  
35  
36 399 models with implementation climate at Time 2 as the outcome, which is a theoretical outcome of  
37  
38 400 implementation leadership.<sup>47,48</sup> Multilevel modelling was used to account for the nestedness of the data  
39  
40 401 (employees nested in workgroups) using Mplus 7.2 and maximum-likelihood estimation.<sup>74</sup> All  
41  
42 402 predictors were grand-mean centred before being entered in the model.<sup>75</sup> We expect a positive  
43  
44 403 relation between active leadership at Time 1 and implementation climate at Time 2 when age, gender  
45  
46 404 and education are controlled for. These relations were modelled on the individual level (Level 1).

47  
48 405

## 49 50 51 406 **Results**

### 52 53 54 407 *Examination of items and dimensionality*

408 Initial examination of the items when conducting the CFA resulted in the removal of four of the 20  
 409 items. These items either did not capture the intended construct (factor loading < .4) or had low  
 410 correlations ( $r < .3$ ) with other items of the same construct,<sup>76</sup> and one of them was excluded due to  
 411 participants commenting that it was difficult to understand, and thus to answer. Consequently, 16  
 412 items were included for all further calculations.

413 To investigate the dimensionality of the scale (i.e. whether the subscales can be separated from each  
 414 other), five competing models were compared. Description of the models and findings from these  
 415 model comparisons are presented in Table 1. The results from the CFA showed that Model 1, our  
 416 hypothesized model with four active implementation leadership subscales, was the best fitting model.  
 417 That is, Models 2, 3, 4 and 5 fit the data significantly worse than Model 1, which had an acceptable  
 418 model fit ( $\chi^2_{(99)} = 382.864^{**}$ , CFI=.935, TLI=.911, RMSEA=.059). Figure 1 displays the standardized  
 419 factor loadings of this model.

421 **Table 1.** Model comparisons.

| Models  | $\chi^2$   | df  | CFI  | TLI  | RMSEA | AIC      | Model comparison | $\Delta$ df | $\Delta \chi^2$ |
|---------|------------|-----|------|------|-------|----------|------------------|-------------|-----------------|
| Model 1 | 382.864**  | 99  | .935 | .911 | .059  | 488.864  |                  |             |                 |
| Model 2 | 388.906**  | 100 | .934 | .911 | .060  | 492.906  | 1 vs 2           | 1           | 6.04*           |
| Model 3 | 452.720**  | 101 | .920 | .892 | .065  | 554.720  | 2 vs 3           | 1           | 63.81**         |
| Model 4 | 501.158**  | 103 | .909 | .880 | .069  | 599.158  | 3 vs 4           | 2           | 48.44**         |
| Model 5 | 1655.889** | 170 | .740 | .678 | .104  | 1775.889 | 4 vs 5           | 67          | 1154.73**       |

422 Note: N=336; \*\*  $p < 0.01$ ; \*  $p < 0.05$ .

423 *Model 1:* exemplary behaviours (EB), individualized consideration (IC), intellectual stimulation (IS), and contingent reward (CR) were  
 424 included as four first-order factors under one second-order factor for active leadership (AL), and passive leadership (PL) was intercorrelated  
 425 with AL; *Model 2:* IC and IS were collapsed into one factor, resulting in three first-order factors for the AL second-order factor, and PL was  
 426 intercorrelated with AL; *Model 3:* EB, IC and IS were collapsed into one factor, resulting in two first-order factors for the AL second-order  
 427 factor, and PL was intercorrelated with AL; *Model 4:* all the active factors (transformational leadership sub-factors and CR) were collapsed  
 428 into one first-order factor, and PL was intercorrelated with AL; *Model 5:* all items loaded on one single factor.

429

430

431 --- **Figure 1 about here** ---

432

433 Hence, the final scale includes 16 items representing four active leadership subscales (i.e., *exemplary*  
 434 *behaviours* (6 items), *individualized consideration* (2 items), *intellectual stimulation* (3 items), and  
 435 *contingent reward* (2 items)) and passive leadership (3 items). Internal consistency was considered

436 satisfactory for all subscales ( $\alpha > .70^{59}$ ). The final iLead scale, its constituent items, and internal  
 437 consistency of the subscales are presented in Table 2.

438

439 **Table 2.** The iLead scale and internal consistency of subscales.

| 440                                                                                                                                       | 441 | 442        | 443      | 444 | 445 | 446 | 447 | 448 | 449 |
|-------------------------------------------------------------------------------------------------------------------------------------------|-----|------------|----------|-----|-----|-----|-----|-----|-----|
| Scales and constituent items                                                                                                              |     | $\alpha$   | Item no. |     |     |     |     |     |     |
| <b>1. Active implementation leadership</b>                                                                                                |     | <b>.95</b> |          |     |     |     |     |     |     |
| <b>1a. Exemplary behaviours</b>                                                                                                           |     | <b>.92</b> |          |     |     |     |     |     |     |
| <i>My closest manager...</i>                                                                                                              |     |            |          |     |     |     |     |     |     |
| ...has shown determination to maintain the new working method                                                                             |     |            | 1        |     |     |     |     |     |     |
| ...has talked about his/her values and beliefs of why it is important to work according to the new working method                         |     |            | 2        |     |     |     |     |     |     |
| ...has actively worked towards implementing the new working method                                                                        |     |            | 3        |     |     |     |     |     |     |
| ...has continuously encouraged us in the implementation of the new working method                                                         |     |            | 4        |     |     |     |     |     |     |
| ...has behaved in a way that explicitly displays commitment to working according to the new working method                                |     |            | 5        |     |     |     |     |     |     |
| ...has been positive towards the implementation of the new working method                                                                 |     |            | 6        |     |     |     |     |     |     |
| <b>1b. Individualized consideration</b>                                                                                                   |     | <b>.80</b> |          |     |     |     |     |     |     |
| <i>My closest manager...</i>                                                                                                              |     |            |          |     |     |     |     |     |     |
| ...has spent time showing me how I can work according to the new working method                                                           |     |            | 7        |     |     |     |     |     |     |
| ...has given me the opportunity to speak to him/her about what consequences the implementation of the new working method will have for me |     |            | 8        |     |     |     |     |     |     |
| <b>1c. Intellectual stimulation</b>                                                                                                       |     | <b>.83</b> |          |     |     |     |     |     |     |
| <i>My closest manager...</i>                                                                                                              |     |            |          |     |     |     |     |     |     |
| ...has done a lot to involve us in the implementation of the new working method                                                           |     |            | 9        |     |     |     |     |     |     |
| ...has encouraged me to express my ideas and opinions about implementing the new working method                                           |     |            | 10       |     |     |     |     |     |     |
| ...has shared whatever information he/she has about the implementation of the new working method                                          |     |            | 11       |     |     |     |     |     |     |
| <b>1d. Contingent reward</b>                                                                                                              |     | <b>.85</b> |          |     |     |     |     |     |     |
| <i>My closest manager...</i>                                                                                                              |     |            |          |     |     |     |     |     |     |
| ...has shown satisfaction when I work according to the new working method                                                                 |     |            | 12       |     |     |     |     |     |     |
| ...has shown appreciation when we have achieved our goals to implement the new working method at our workplace                            |     |            | 13       |     |     |     |     |     |     |
| <b>2. Passive implementation leadership</b>                                                                                               |     | <b>.91</b> |          |     |     |     |     |     |     |
| <i>My closest manager...</i>                                                                                                              |     |            |          |     |     |     |     |     |     |
| ...has avoided to intervene until major problems with the implementation of the new working method have arisen                            |     |            | 14       |     |     |     |     |     |     |
| ...has waited for things to go wrong with the implementation of the new working method before taking any action                           |     |            | 15       |     |     |     |     |     |     |
| ...has avoided making decisions that affect the implementation of the new working method                                                  |     |            | 16       |     |     |     |     |     |     |

Note: N=324–336, due to missing data on some items (pairwise deletion).

441

442

443 *Convergent and discriminant validity*

444 Bivariate correlations of all the measures in the present study and descriptive statistics are presented in

445 Table 3. To assess convergent validity, the correlations between active leadership and general

446 transformational and transactional leadership were calculated. Correlations between the sub-factors of

447 active and general transformational leadership ( $r=.70 - .78^{**}$ ) and transactional leadership ( $r=.61 -$

448  $.70^{**}$ ) were high, supporting convergent validity. To assess discriminant validity, the correlations

449 between passive leadership and general transformational and transactional leadership were calculated,

450 showing a correlation of  $r=-.22^{**}$  with general transformational leadership and a correlation of  $r=-.18^{**}$   
 451 with transactional leadership. These results support discriminant validity.

452

453 **Table 3.** Bivariate correlations of study measures.

| Scales                                 | Mean | SD   | 1a     | 1b    | 1c     | 1d     | 2      | 3     | 4     | 5 |
|----------------------------------------|------|------|--------|-------|--------|--------|--------|-------|-------|---|
| 1. Active implementation leadership    | 3.84 | 0.88 |        |       |        |        |        |       |       |   |
| 1a. Exemplary behaviours               | 4.06 | 0.86 |        |       |        |        |        |       |       |   |
| 1b. Individualized consideration       | 3.60 | 1.10 | .73**  |       |        |        |        |       |       |   |
| 1c. Intellectual stimulation           | 3.87 | 0.93 | .87**  | .84** |        |        |        |       |       |   |
| 1d. Contingent reward                  | 3.84 | 0.97 | .75**  | .71** | .76**  |        |        |       |       |   |
| 2. Passive implementation leadership   | 2.01 | 1.17 | -.20** | -.12* | -.20** | -.17** |        |       |       |   |
| 3. General transformational leadership | 3.87 | 0.93 | .77**  | .70** | .78**  | .70**  | -.22** |       |       |   |
| 4. General transactional leadership    | 3.79 | 0.97 | .68**  | .64** | .70**  | .61**  | -.18** | .86** |       |   |
| 5. Implementation climate              | 3.92 | 0.92 | .34**  | .37** | .27**  | .45**  | -.17*  | .44** | .44** |   |

454 Note: N=158–649, due to missing data on some items (pairwise deletion); \*\*  $p < 0.01$ . Data was collected at Time 1 for all measures, except  
 455 for Implementation climate, which was collected at Time 2.

456

#### 457 *Criterion-related validity*

458 Criterion-related validity was tested by examining the relationship between implementation climate  
 459 (measured at Time 2) and active and passive leadership at Time 1. In line with expectations, findings  
 460 show that when age, gender and education were controlled for, active leadership significantly  
 461 predicted implementation climate ( $B=.40^*$ ). A slight negative relation that was not statistically  
 462 significant ( $B= -.07$ ) was observed between passive leadership and implementation climate (Table 4).

463

464 **Table 4.** Multilevel regressions: Implementation climate regressed on age, gender, education, and  
 465 active and passive implementation leadership.

| Predictor variables               | Model 1     | Model 2    |
|-----------------------------------|-------------|------------|
|                                   | B (SE)      | B (SE)     |
| Age                               | .009*(.004) | -.01*(.01) |
| Gender (women)                    | .14 (.15)   | .07 (.16)  |
| University education              | -.10 (.15)  | .06 (.17)  |
| Active implementation leadership  |             | .40* (.08) |
| Passive implementation leadership |             | -.07 (.05) |

466 Note: \*  $p < 0.05$ ; ICC=.15

467

468

469

## 470 **Discussion**

1  
2  
3 471 The aim of the present study was to adapt previous domain-specific scales to create and validate an  
4 472 active and passive implementation-specific leadership scale that follows the factor structure of the  
5  
6 473 FRLM – the iLead scale. The analyses supported good psychometric properties for the scale. Thus, the  
7  
8 474 iLead scale can be used to assess how managers lead an implementation. This scale complements the  
9  
10 475 knowledge about what leaders do and meets the need for a scale linking implementation leadership  
11  
12 476 with theory. This is essential for uncovering how day-to-day leadership affects the implementation  
13  
14 477 process.  
15  
16  
17 478

19 479 The predicted four subscales for active leadership and the scale for passive leadership were confirmed  
20  
21 480 through CFA. Thus, analysis supports the existence of two distinct dimensions: active and passive  
22  
23 481 leadership. As specified, active leadership was differentiated into four sub-factors: *exemplary*  
24  
25 482 *behaviours, intellectual stimulation, individualized consideration and contingent reward* with a  
26  
27 483 common second-order factor representing active leadership. This indicates that even though different  
28  
29 484 sub-factors could be distinguished, they were all highly related, as captured in the second-order factor  
30  
31 485 (i.e. active leadership). This is in line with previous studies in which a second-order factor has been  
32  
33 486 used to capture the correlation between the sub-factors.<sup>19,33,38</sup> These findings were also confirmed by  
34  
35 487 the bifactor model. This analysis showed that the common factor of active leadership explained a large  
36  
37 488 part of the variance, with a unique contribution of each of the four subscales. Similar to other  
38  
39 489 theoretical constructs (e.g., intelligence or self-rated productivity), this means that each subscale  
40  
41 490 reflects the common factor of active leadership to a larger extent than it reflects the subscales and  
42  
43 491 should not be analysed independently without the common factor (Supplementary appendix 2).  
44  
45 492 Nevertheless, since each sub-factor contributes with unique variance, they should still be distinguished  
46  
47 493 in the model, and they can be used in the context of providing actionable feedback to managers in  
48  
49 494 leadership training.<sup>18,27,35</sup> In this context, the level of detail provided through the subscales help  
50  
51 495 distinguish which specific sub-type of leader behaviours that need to improve. Thus, the iLead scale  
52  
53 496 can be used in implementation training, for example to provide leaders with feedback and to evaluate  
54  
55 497 the training, in addition to the research context.  
56  
57  
58  
59  
60

498

499 As anticipated, findings demonstrated that the passive leadership dimension is empirically distinct  
500 from, although correlated with, the active one. This indicates that having a scale that represents the  
501 continuum of leader behaviours in the same structural model is feasible for capturing both effective  
502 and ineffective leader behaviours. In the present study, *passive management-by-exception* and *laissez-*  
503 *faire* items represent the passive domain, considering their ineffective styles.<sup>18,20</sup> To date, most  
504 research has focused on active leader behaviours,<sup>15,16</sup> despite the fact that both active and passive  
505 leader behaviours influence employees and organizational outcomes.<sup>18,20,23</sup> However, the importance  
506 of also considering passive leader behaviours is receiving more research attention.<sup>20,21</sup> For instance, a  
507 study investigating the impact of safety-specific transformational and passive leadership on safety  
508 outcomes demonstrated that the safety-specific passive leader behaviours had a negative effect on  
509 outcomes (i.e. increased injury).<sup>20</sup> To date, implementation research has not focused on assessing  
510 ineffective leader behaviours or investigated their influence on an implementation process. Through  
511 the creation of the iLead scale, there is now a way to assess not only active, but also passive leadership  
512 within the implementation context. This is an important next step, since passive behaviours may  
513 actually have a negative impact when implementing change. The present study thereby adds to  
514 existing knowledge of the overall effect of leadership on the implementation process. Consequently,  
515 the iLead scale complements the existing Implementation Leadership Scale (ILS), which focuses on  
516 measuring active implementation leadership.

517

518 The validity of the iLead scale was evaluated by investigating how it relates to other  
519 measurements.<sup>59,72</sup> Findings confirmed expected negative relations between the passive leadership and  
520 general transformational<sup>33</sup> and transactional leadership.<sup>18,20</sup> Moreover, the expected positive relations  
521 between active implementation leadership with the general leadership scales were confirmed with  
522 moderate to high correlations. This indicates that these measures belong to a similar latent construct,  
523 but that the iLead scale also captures certain unique aspects of leadership. Furthermore, active  
524 leadership predicted a higher implementation climate over time, whereas passive leadership was not

1  
2  
3 525 significantly associated with implementation climate. This finding contradicts previous research that  
4  
5 526 has found a negative correlation with passive leadership and specific climate.<sup>20</sup> Thus, this should be  
6  
7 527 further explored in future studies. That active leadership predicts implementation climate is in line  
8  
9 528 with implementation frameworks summarizing the process of implementation, for instance the  
10  
11 529 Exploration, Preparation, Implementation and Sustainment (EPIS) model.<sup>77</sup> According to EPIS, active  
12  
13 530 leadership should ultimately result in a favourable climate at the workplace, with employees  
14  
15 531 perceiving implementation as part of the daily routine. These predictions have been confirmed in  
16  
17 532 several empirical studies.<sup>45,78</sup>

18  
19 533

20  
21  
22 534 A methodological aspect worth mentioning is that only those employees who could remember a  
23  
24 535 specific implementation effort conducted at their workplace during the past six months were asked to  
25  
26 536 respond to the iLead scale. Therefore, only 41% of the 815 eligible respondents answered the iLead  
27  
28 537 scale. This aspect is perceived as informative, since leadership research has previously been criticized  
29  
30 538 for assuming that employees have actually witnessed, and can therefore rate, the behaviour of their  
31  
32 539 manager, which is not always the case.<sup>79</sup> Thus, to be particularly restrictive in evaluating this new  
33  
34 540 measure, a filter variable was included in the questionnaire to ensure that employees actually had valid  
35  
36 541 knowledge of their manager's implementation leader behaviour. It may be argued that those who  
37  
38 542 answered these questions were those who could make a proper judgement about their manager's  
39  
40 543 implementation leadership. The sample size was nonetheless still sufficient, as there were at least ten  
41  
42 544 times more raters than questionnaire items in the analyses.<sup>69</sup>

43  
44 545

45  
46  
47 546 The scale did not include *active management-by-exception* from the FRLM, which is described as the  
48  
49 547 leader looking for mistakes and enforcing rules to avoid these mistakes.<sup>18</sup> This was a result of certain  
50  
51 548 problems associated with this construct. For instance, the operationalization of *active management-by-*  
52  
53 549 *exception* is specifically troublesome since it often focuses only on negative control behaviours, such  
54  
55 550 as stopping behaviours.<sup>51</sup> This is despite the fact that it theoretically also includes positive control

1  
2  
3 551 behaviours, such as monitoring and enforcing policies and routines, which show that the specific  
4  
5 552 objective (e.g. implementation or safety) is an enacted priority.<sup>51</sup> Moreover, the reliability of subscales  
6  
7 553 aiming to capture *active management-by-exception* has been problematic.<sup>23</sup> Research has also  
8  
9 554 indicated that, primarily, transformational leadership and contingent reward are those leader  
10  
11 555 behaviours that result in positive effects.<sup>18,23</sup> Consequently, the *active management-by-exception* factor  
12  
13 556 was excluded from the iLead scale, which only incorporates the FRLM leadership dimensions that can  
14  
15 557 be clearly distinguished into an overall active or passive implementation leadership category. This is  
16  
17 558 in line with previously developed scales.<sup>20,49</sup>

18  
19 559

20  
21  
22 560 Only three items were included to measure passive leadership. Although it is crucial to capture leader  
23  
24 561 behaviours that may hinder an implementation process (passive leadership), it is even more valuable to  
25  
26 562 capture those that have a positive effect on, and promote successful, implementation (active  
27  
28 563 leadership), especially when using the scale in a leadership intervention as a source of feedback.  
29  
30 564 Moreover, some sub-factors are represented by fewer than the recommended three items for new  
31  
32 565 scales.<sup>80</sup> However, the iLead scale is based on the FRLM and previous domain-specific scales. In  
33  
34 566 addition, there are examples of brief and even single-items scales that have good psychometric  
35  
36 567 properties.<sup>59</sup> With the healthcare setting in mind when adapting and creating the iLead scale, the  
37  
38 568 ambition was to make it as pragmatic and feasible as possible to use in practice.<sup>81</sup> Thus, the iLead  
39  
40 569 scale is a brief, concise, and broadly applicable scale that may be used in the daily practice where  
41  
42 570 continuous implementations are performed to improve patient outcomes.

43  
44 571

## 45 46 47 572 **Conclusions**

48  
49 573 This study describes a scale with good psychometric properties for measuring active and passive  
50  
51 574 implementation leadership – the iLead scale. Including these aspects is relevant since both active and  
52  
53 575 passive leader behaviours may influence employees' performance throughout an implementation  
54  
55 576 process. More explicitly, the scale measures both what leaders do as well as how they perform these



1  
2  
3 577 actions, through *exemplary behaviour, individualized consideration, intellectual stimulation* and  
4 578 *contingent reward*, as well as *passive behaviours*. The iLead scale is based on the most widely applied  
5  
6 579 leadership model, the FRLM, which makes the results relatable to a vast amount of research based on  
7  
8 580 this theory. It also measures implementation-specific leadership in contrast to general leadership.  
9  
10 581 Domain-specific leadership is associated with being more predictive for specific outcomes, such as  
11  
12 582 implementation success, than general leadership. Thus, the iLead scale is a valid tool that can be used  
13  
14 583 to understand how leader behaviours influence implementation success, and may be particularly  
15  
16 584 valuable to apply in training implementation and evaluating leader training.  
17  
18  
19  
20  
21

## 22 586 **Abbreviations**

23  
24 587 CFA: Confirmatory Factor Analysis

25  
26  
27 588 COP: Co-created program theory

28  
29 589 EBP: Evidence-Based Practice

30  
31  
32 590 FRLM: The Full-Range Leadership Model

33  
34  
35 591

## 36 37 592 **Ethics approval and consent to publish**

38  
39 593 Ethical approval for the data collection was obtained from the local ethics committee in Stockholm,  
40  
41 594 Sweden (ref no. 2015/857-31/5). Informed consent has been obtained from all participants included in  
42  
43 595 the present study.  
44

45 596

## 46 47 48 597 **Consent for publication**

49  
50 598 Not applicable.

51  
52  
53 599

## 54 55 56 600 **Availability of data and materials**

1  
2  
3 601 Please contact author for data requests.  
4

5 602  
6  
7

8 603 **Competing interests**  
9

10 604 The authors declare that they have no competing interests.  
11  
12

13 605  
14

15 606 **Funding**  
16

17 607 This study is part of a project that has received research grant funding from AFA Insurance (project  
18 no. 140114) after competitive peer review. AFA Insurance is one of the largest nationally recognized  
19 Swedish research agencies funding research on work environment and health. The funder did not have  
20 any role in the design of the project.  
21  
22  
23 610  
24

25 611  
26

27 612 **Authors' contributions**  
28

29  
30 613 RM, AR, UvTS, HH and RL contributed to the theoretical background and study design. RM, AR,  
31 UvTS and HH contributed to the item development. RM performed the data analysis, with  
32 contributions from AR. For the present article, RM drafted the first version. All other authors  
33 contributed to writing and editing all parts of the article. All authors have approved the final version.  
34  
35 616  
36  
37

38 617  
39

40 618 **Acknowledgements**  
41

42  
43 619 The authors would like to extend special thanks to the employees who answered the questionnaire,  
44 thus making this study possible.  
45  
46

47 621  
48  
49

50 622 **Author details**  
51

52 623 <sup>1</sup> Procome Research Group, Medical Management Centre, Department of Learning, Informatics,  
53 Management and Ethics, Karolinska Institutet, 171 77 Stockholm, Sweden.  
54  
55

1  
2  
3 625 <sup>2</sup> Unit for Implementation, Centre for Epidemiology and Community Medicine (CES), Stockholm  
4 626 County Council, 171 29 Stockholm, Sweden.

5  
6 627 <sup>3</sup> School of Health, Care and Social Welfare, Mälardalen University, Box 883, SE 721 23 Västerås,  
7  
8 628 Sweden

9  
10 629

11  
12 630

13  
14  
15 631 **References**

16 632

17  
18 633 1. Grimshaw JM, Eccles MP, Lavis JN, Hill SJ, Squires JE. Knowledge translation of research  
19 634 findings. *Implement Sci.* 2012;7:50.

20  
21  
22 635 2. Grol R, Grimshaw J. From best evidence to best practice: effective implementation of change in  
23 636 patients' care. *Lancet.* 2003;362(9391):1225-30.

24  
25  
26 637 3. Damschroder LJ, Aron DC, Keith RE, Kirsh SR, Alexander Ja, Lowery JC. Fostering  
27 638 implementation of health services research findings into practice: a consolidated framework for  
28 639 advancing implementation science. *Implement Sci.* 2009;4:50.

29  
30  
31  
32 640 4. Squires JE, Graham ID, Hutchinson AM, Michie S, Francis JJ, Sales A, et al. Identifying the  
33 641 domains of context important to implementation science: a study protocol. *Implement Sci.*  
34 642 2015;10:135.

35  
36  
37  
38 643 5. Rycroft-Malone J. The PARIHS framework--a framework for guiding the implementation of  
39 644 evidence-based practice. *J Nurs Care Qual.* 2004;19(4):297-304.

40  
41  
42 645 6. Greenhalgh T, Robert G, Macfarlane F, Bate P, Kyriakidou O. Diffusion of innovations in service  
43 646 organizations: systematic review and recommendations. *Milbank Q.* 2004;82(4):581-629.

44  
45  
46 647 7. Ovretveit J. Improvement leaders: what do they and should they do? A summary of a review of  
47 648 research. *Qual Saf Health Care.* 2010;19(6):490-2.

48  
49  
50 649 8. Stetler C, Ritchie J, Rycroft-Malone J, Schultz A, Charns M. Institutionalizing evidence-based  
51 650 practice: an organizational case study using a model of strategic change. *Implement Sci.*  
52 651 2009;4(1):78.

- 1  
2  
3 652 9. Birken SA, Lee SY, Weiner BJ. Uncovering middle managers' role in healthcare innovation  
4 653 implementation. *Implement Sci.* 2012;7:28.  
5  
6 654 10. Aarons GA, Ehrhart MG, Farahnak LR, Hurlburt MS. Leadership and organizational change for  
7 655 implementation (LOCI): a randomized mixed method pilot study of a leadership and organization  
8 656 development intervention for evidence-based practice implementation. *Implement Sci.*  
9 657 2015;10(1):11.  
10  
11 658 11. Gifford W, Davies B, Edwards N, Griffin P, Lybanon V. Managerial leadership for nurses' use of  
12 659 research evidence: an integrative review of the literature. *Worldv Evid-Based Nu.* 2007;4(3):126-  
13 660 45.  
14  
15 661 12. Sandstrom B, Borglin G, Nilsson R, Willman A. Promoting the implementation of evidence-based  
16 662 practice: a literature review focusing on the role of nursing leadership. *Worldv Evid-Based Nu.*  
17 663 2011;8(4):212-23.  
18  
19 664 13. Reichenpfader U, Carlford S, Nilsen P. Leadership in evidence-based practice: a systematic  
20 665 review. *Leadersh Health Serv.* 2015;28(4):298-316.  
21  
22 666 14. Avolio BJ, Walumbwa FO, Weber TJ. Leadership: current theories, research, and future  
23 667 directions. *Annu Rev Psychol.* 2009;60:421-49.  
24  
25 668 15. Lowe KB, Gardner WL. Ten years of The leadership quarterly: contributions and challenges for  
26 669 the future. *Leadersh Q.* 2000;11(4):459-514.  
27  
28 670 16. Judge TA, Piccolo RF. Transformational and transactional leadership: a meta-analytic test of their  
29 671 relative validity. *Journal Appl Psychol.* 2004;89(5):755-68.  
30  
31 672 17. Antonakis J, House RJ. Instrumental leadership: measurement and extension of transformational-  
32 673 transactional leadership theory. *Leadership Q.* 2014;25(4):746-71.  
33  
34 674 18. Avolio J, Bass B, Jung D. Re-examining the components of transformational and transactional  
35 675 leadership using the multifactor leadership questionnaire. *J Occup Organ Psychol.* 1999;72:441 -  
36 676 62.  
37  
38 677 19. Bycio P, Hackett RD, Allen JS. Further assessments of Bass's (1985) conceptualization of  
39 678 transactional and transformational leadership. *Journal Appl Psychol.* 1995;80(4):468-78.  
40  
41  
42  
43  
44  
45  
46  
47  
48  
49  
50  
51  
52  
53  
54  
55  
56  
57  
58  
59  
60

- 1  
2  
3 679 20. Kelloway EK, Mullen J, Francis L. Divergent effects of transformational and passive leadership  
4 680 on employee safety. *J Occup Health Psychol.* 2006;11(1):76-86.  
5  
6 681 21. Bass BM. *Leadership and Performance Beyond Expectations.* New York: Free Press; 1985.  
7  
8 682 22. Barling J, Weber T, Kelloway EK. Effects of transformational leadership training on attitudinal  
9 683 and financial outcomes: a field experiment. *Journal Appl Psychol.* 1996;81(6):827-32.  
10  
11 684 23. Bass BM, Avolio BJ, Jung DI, Berson Y. Predicting unit performance by assessing  
12 685 transformational and transactional leadership. *Journal Appl Psychol.* 2003;88(2):207-18.  
13  
14 686 24. Eisenbach R, Watson K, Pillai R. Transformational leadership in the context of organizational  
15 687 change. *J Organ Chang Manag.* 1999;12(2):80-9.  
16  
17 688 25. Holten A-L, Brenner SO. Leadership style and the process of organizational change. *Leadership*  
18 689 *Org Dev J.* 2015;36(1):2-16.  
19  
20 690 26. Jung DI, Chow C, Wu A. The role of transformational leadership in enhancing organizational  
21 691 innovation: Hypotheses and some preliminary findings. *Leadership Q.* 2003;14(4-5):525-44.  
22  
23 692 27. Den Hartog DN, House RJ, Hanges PJ, Ruiz-Quintanilla SA, Dorfman PW. Culture specific and  
24 693 cross-culturally generalizable implicit leadership theories: Are attributes of  
25 694 charismatic/transformational leadership universally endorsed? *Leadership Q.* 1999;10(2):219-56.  
26  
27 695 28. Michaelis B, Stegmaier R, Sonntag K. Shedding light on followers' innovation implementation  
28 696 behavior. *J Manage Psychol.* 2010;25(4):408-29.  
29  
30 697 29. Herold DM, Fedor DB, Caldwell S, Liu Y. The effects of transformational and change leadership  
31 698 on employees' commitment to a change: a multilevel study. *J Appl Psychol.* 2008;93(2):346-57.  
32  
33 699 30. Yukl G. *Leadership in Organizations.* 6<sup>th</sup> ed. New Jersey: Pearson Higher Education; 2005.  
34  
35 700 31. Barbuto JE. Motivation and transactional, charismatic, and transformational leadership: a test of  
36 701 antecedents. *JLOS.* 2005;11(4):26-40.  
37  
38 702 32. Hardy L, Arthur CA, Jones G, Shariff A, Munnoch K, Isaacs I, et al. The relationship between  
39 703 transformational leadership behaviors, psychological, and training outcomes in elite military  
40 704 recruits. *Leadership Q.* 2010;21(1):20-32.  
41  
42 705 33. Carless S, Wearing A, Mann L. A short measure of transformational leadership. *JBP.*  
43 706 2000;14(3):389-405.  
44  
45  
46  
47  
48  
49  
50  
51  
52  
53  
54  
55  
56  
57  
58  
59  
60

- 1  
2  
3 707 34. Podsakoff PM, MacKenzie SB, Bommer WH. Transformational Leader Behaviors and Substitutes  
4 708 for Leadership as Determinants of Employee Satisfaction, Commitment, Trust, and Organizational  
5 709 Citizenship Behaviors. *JOM*. 1996;22(2):259-98.
- 6  
7  
8 710 35. Antonakis J, Avolio BJ, Sivasubramaniam N. Context and leadership: an examination of the nine-  
9 711 factor full-range leadership theory using the Multifactor Leadership Questionnaire. *Leadership Q*.  
10 712 2003;14(3):261-95.
- 11  
12  
13 713 36. Larsson G. The Developmental Leadership Questionnaire (DLQ): some psychometric properties.  
14 714 *Scand J Psychol*. 2006;47(4):253-62.
- 15  
16  
17 715 37. Rafferty AE, Griffin MA. Dimensions of transformational leadership: Conceptual and empirical  
18 716 extensions. *Leadership Q*. 2004;15(3):329-54.
- 19  
20  
21 717 38. Tepper BJ, Percy PM. Structural Validity of the Multifactor Leadership Questionnaire. *Educ*  
22 718 *Psychol Meas*. 1994;54(3):734-44.
- 23  
24  
25 719 39. Hinkin TR, Tracey JB. The relevance of charisma for transformational leadership in stable  
26 720 organizations. *JOCM*. 1999;12(2):105-19
- 27  
28  
29 721 40. Barbuto JE. Motivation and transactional, charismatic, and transformational leadership: a test of  
30 722 antecedents. *JLOS*. 2005;11(4):26-40.
- 31  
32  
33 723 41. Clarke S. Safety leadership: A meta-analytic review of transformational and transactional  
34 724 leadership styles as antecedents of safety behaviours. *J Occup Organ Psychol*. 2013;86(1):22-49.
- 35  
36  
37 725 42. Garman AN, Davis-Lenane D, Corrigan PW. Factor structure of the transformational leadership  
38 726 model in human service teams. *J Organ Behav*. 2003;24(6):803-12.
- 39  
40  
41 727 43. Skogstad A, Einarsen S, Torsheim T, Aasland MS, Hetland H. The destructiveness of laissez-faire  
42 728 leadership behavior. *J Occup Health Psychol*. 2007;12(1):80-92.
- 43  
44  
45 729 44. Dóci E, Stouten J, Hofmans J. The cognitive-behavioral system of leadership: cognitive  
46 730 antecedents of active and passive leadership behaviors. *Front Psychol*. 2015;6:1344.
- 47  
48  
49 731 45. Aarons GA, Ehrhart MG, Farahnak LR, Sklar M. Aligning leadership across systems and  
50 732 organizations to develop a strategic climate for evidence-based practice implementation. *Annu Rev*  
51 733 *Public Health*. 2014;35:255-74.

- 1  
2  
3 734 46. Ehrhart MG, Aarons GA, Farahnak LR. Assessing the organizational context for EBP  
4  
5 735 implementation: the development and validity testing of the Implementation Climate Scale (ICS).  
6  
7 736 *Implement Sci.* 2014;9(1):157.
- 8  
9 737 47. Weiner BJ, Belden CM, Bergmire DM, Johnston M. The meaning and measurement of  
10  
11 738 implementation climate. *Implement Sci.* 2011;6:78.
- 12  
13 739 48. Aarons GA, Sommerfeld DH. Leadership, innovation climate, and attitudes toward evidence-  
14  
15 740 based practice during a statewide implementation. *J Am Acad Child Adolesc Psychiatry.*  
16  
17 741 2012;51(4):423-31.
- 18  
19 742 49. Barling J, Loughlin C, Kelloway EK. Development and test of a model linking safety-specific  
20  
21 743 transformational leadership and occupational safety. *J Appl Psychol.* 2002;87(3):488-96.
- 22  
23 744 50. Hong Y, Liao H, Hu J, Jiang K. Missing link in the service profit chain: a meta-analytic review of  
24  
25 745 the antecedents, consequences, and moderators of service climate. *J Appl Psychol.*  
26  
27 746 2013;98(2):237-67.
- 28  
29 747 51. von Thiele Schwarz U, Hasson H, Tafvelin S. Leadership training as an occupational health  
30  
31 748 intervention: improved safety and sustained productivity. *Safety Sci.* 2016;81:35-45.
- 32  
33 749 52. Gurt J, Schwennen C, Elke G. Health-specific leadership: Is there an association between leader  
34  
35 750 consideration for the health of employees and their strain and well-being? *Work Stress.*  
36  
37 751 2011;25(2):108-27.
- 38  
39 752 53. Northouse P. Leadership: Theory and Practice. 5<sup>th</sup> ed. London: SAGE Publications, Inc.; 2010.
- 40  
41 753 54. Lewis R, Donaldson-Fielder E. The vital role of line managers in managing psychosocial risks. In:  
42  
43 754 Biron C, Karanika-Murray M, Cooper C (Eds.), *Improving Organizational Interventions for Stress*  
44  
45 755 *and Well-being: Addressing Process and Context.* Oxford: Routledge; 2012.
- 46  
47 756 55. Lundmark R, Hasson H, von Thiele Schwarz U, Hasson D, Tafvelin S. Leading for change: line  
48  
49 757 managers' influence on the outcomes of an occupational health intervention. *Work Stress.*  
50  
51 758 2017;31(3):276-96.
- 52  
53 759 56. Aarons GA, Ehrhart MG, Farahnak LR. The Implementation Leadership Scale (ILS): development  
54  
55 760 of a brief measure of unit level implementation leadership. *Implement Sci.* 2014;9(1):45.

- 1  
2  
3 761 57. Randall R, Nielsen K, Tvedt SD. The development of five scales to measure employees'  
4 762 appraisals of organizational-level stress management interventions. *Work Stress*. 2009;23(1):1-23.  
5  
6 763 58. Richter A, von Thiele Schwarz U, Lornudd C, Lundmark R, Mosson R, Hasson H. iLead—a  
7 764 transformational leadership intervention to train healthcare managers' implementation leadership.  
8  
9 765 *Implement Sci*. 2016;11(1):1-13.  
10  
11 766 59. Furr M. Scale Construction and Psychometrics for Social and Personality Psychology. London,  
12  
13 767 United Kingdom: SAGE Publications Ltd; 2013.  
14  
15 768 60. Hasson H, von Thiele Schwarz U. Useful Evidence: Adherence and Adaptations (in Swedish:  
16  
17 769 Användbar evidens: om följsamhet och anpassningar). Stockholm: Natur & Kultur; 2017. p. 210-  
18  
19 770 211.  
20  
21 771 61. Lee A, Carpenter NC. Seeing eye to eye: A meta-analysis of self-other agreement of leadership.  
22  
23 772 *Leadership Q*. 2017: doi:<https://doi.org/10.1016/j.leaqua.2017.06.002>  
24  
25 773 62. Fleenor JW, Smither JW, Atwater LE, Braddy PW, Sturm RE. Self-other rating agreement in  
26  
27 774 leadership: A review. *Leadership Q*. 2010;21(6):1005-34.  
28  
29 775 63. Dvir T, Eden D, Avolio BJ, Shamir B. Impact of Transformational Leadership on Follower  
30  
31 776 Development and Performance: A Field Experiment. *Acad Manage J*. 2002;45(4):735-44.  
32  
33 777 64. Kelloway EK, Barling J, Helleur J. Enhancing transformational leadership: the roles of training  
34  
35 778 and feedback. *LODJ*. 2000;21(3):145-9.  
36  
37 779 65. Statistics Sweden, Theme Labor market, report 2015:4, *Trained health and social care workers –*  
38  
39 780 *today and in the future*  
40  
41 781 66. Bass BM, Yammarino FJ. Congruence of Self and Others' Leadership Ratings of Naval Officers  
42  
43 782 for Understanding Successful Performance. *Appl Psychol*. 1991;40(4):437-454.  
44  
45 783 67. Bass BM. Two Decades of Research and Development in Transformational Leadership. *EJWOP*.  
46  
47 784 1999;8(1):9-32.  
48  
49 785 68. Hoyle RH. Confirmatory factor analysis. Handbook of applied multivariate statistics and  
50  
51 786 mathematical modeling. 2000:465-497.  
52  
53 787 69. Byrne B. Structural Equation Modeling with AMOS: Basic Concepts, Applications, and  
54  
55 788 Programming, 2<sup>nd</sup> ed. London: Routledge; 2010.



- 1  
2  
3 789 70. Hu LT, Bentler PM. Cutoff criteria for fit indexes in covariance structure analysis: conventional  
4 790 criteria versus new alternatives. *Struc Equ Modeling*. 1999;6(1):1-55.
- 5  
6 791 71. Marsh HW, Hau K-T, Wen Z. In Search of Golden Rules: Comment on Hypothesis-Testing  
7 792 Approaches to Setting Cutoff Values for Fit Indexes and Dangers in Overgeneralizing Hu and  
8 793 Bentler's (1999) Findings. *Struct Equ Modeling*. 2004;11(3):320-341.
- 9  
10  
11  
12 794 72. Bollen KA. Structural Equations with Latent Variables. New York: John Wiley & Sons, Inc.;  
13 795 1989.
- 14  
15  
16 796 73. Clinton-McHarg T, Yoong SL, Tzelepis F, Regan T, Fielding A, Skelton E, Kingsland M, Ooi JY,  
17 797 Wolfenden L. Psychometric properties of implementation measures for public health and  
18 798 community settings and mapping of constructs against the Consolidated Framework for  
19 799 Implementation Research: a systematic review. *Implement Sci*. 2016;11(1):148.
- 20  
21  
22  
23 800 74. Hox JJ. Multilevel analysis: Techniques and applications. 2 ed. New York: Routledge; 2010.
- 24  
25  
26 801 75. Enders CK, Tofighi D. Centering predictor variables in cross-sectional multilevel models: a new  
27 802 look at an old issue. *Psychol Methods*. 2007;12(2):121-38.
- 28  
29  
30 803 76. Hair JF TR, Anderson RE, Black W. Multivariate data analysis. London: Prentice-Hall; 1998.
- 31  
32  
33 804 77. Aarons GA, Hurlburt M, Horwitz SM. Advancing a conceptual model of evidence-based practice  
34 805 implementation in public service sectors. *Adm Policy Ment Health*. 2011;38(1):4-23.
- 35  
36  
37 806 78. Aarons GA. Transformational and transactional leadership: association with attitudes toward  
38 807 evidence-based practice. *Psychiatr Serv*. 2006;57(8):1162-9.
- 39  
40  
41 808 79. Hunter ST, Bedell-Avers KE, Mumford MD. The typical leadership study: Assumptions,  
42 809 implications, and potential remedies. *Leadership Q*. 2007;18(5):435-46.
- 43  
44  
45 810 80. Hinkin TR. A Brief Tutorial on the Development of Measures for Use in Survey Questionnaires.  
46 811 *Organ Res Meth*. 1998;1(1):104-121.
- 47  
48  
49 812 81. Glasgow RE, Riley WT. Pragmatic measures: what they are and why we need them. *Am J Prev*  
50 813 *Med*. 2013;45(2):237-243.
- 51  
52  
53  
54  
55  
56  
57  
58  
59  
60

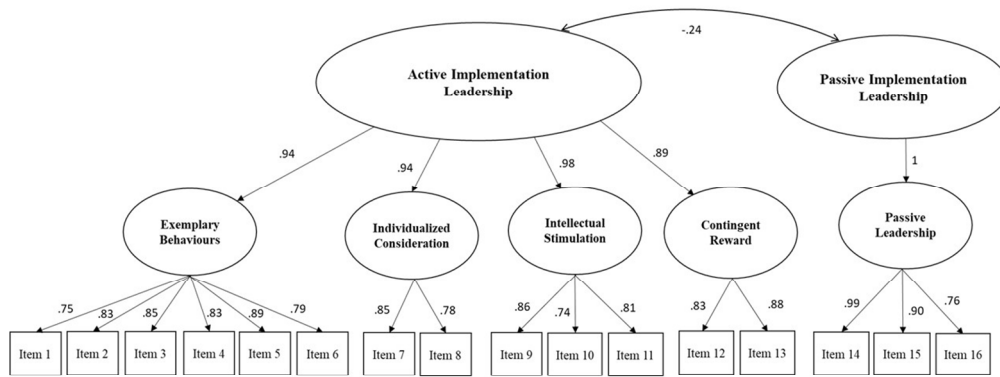

Figure 1. Standardized factor loadings for the iLead scale. † Note: n=336; All confirmatory factor analysis factor loadings are for Model 1 ( $\chi^2(99)=382.864^{**}$ , CFI=.935, TLI=.911, RMSEA=.059) with four first-order factors under one second-order factor for active implementation leadership, which is intercorrelated with a passive implementation leadership factor.

338x190mm (96 x 96 DPI)

**Supplementary appendix 1: Items from the original domain-specific scales and the adapted items included in the iLead scale**

| Original items                                                                                                                       | Adapted items included in the iLead scale                                                                                                                 |
|--------------------------------------------------------------------------------------------------------------------------------------|-----------------------------------------------------------------------------------------------------------------------------------------------------------|
| <i>Kelloway et al</i> <sup>1</sup>                                                                                                   |                                                                                                                                                           |
| Expresses satisfaction when I perform my job safely                                                                                  | My closest manager has shown satisfaction when I work according to the new working method                                                                 |
| Makes sure that we receive appropriate rewards for achieving safety targets on the job                                               | My closest manager has shown appreciation when we have achieved our goals to implement the new working method at our workplace                            |
| Provides continuous encouragement to do our jobs safely                                                                              | My closest manager has continuously encouraged us in the implementation of the new working method                                                         |
| Shows determination to maintain a safe work environment                                                                              | My closest manager has shown determination to maintain the new working method                                                                             |
| Encourages me to express my ideas and opinion about safety at work                                                                   | My closest manager has encouraged me to express my ideas and opinions about implementing the new working method                                           |
| Talks about his/her values and beliefs of the importance of safety                                                                   | My closest manager has talks about his/her values and beliefs of why it is important to work according the new working method                             |
| Behaves in a way that displays a commitment to a safe workplace                                                                      | My closest manager has behaved in a way that explicitly displays commitment to working according to the new working method                                |
| Spends time showing me the safest way to do things at work                                                                           | My closest manager has spent time showing me how I can work according to the new working method                                                           |
| Avoids making decisions that affect safety on the job                                                                                | My closest manager has avoided making decisions that affect the implementation of the new working method                                                  |
| Fails to intervene until safety problems become serious                                                                              | My closest manager has avoided to intervene until major problems with the implementation of the new working method has already arisen                     |
| Waits for things to go wrong before taking action                                                                                    | My closest manager has waited for things to go wrong with the implementation of the new working method before taking action                               |
| <i>Randall et al</i> <sup>2</sup>                                                                                                    |                                                                                                                                                           |
| My immediate manager has done a lot to involve employees throughout the process                                                      | My closest manager has done a lot to involve us in the implementation of the new working method                                                           |
| My immediate manager shared whatever he/she knew about the implementation of teams                                                   | My closest manager has shared whatever information he/she has about the implementation of the new working method                                          |
| My immediate manager has actively worked towards the implementation of teams                                                         | My closest manager has actively worked towards implementing the new working method                                                                        |
| My immediate manager was positive about the implementation of teams                                                                  | My closest manager has been positive towards the implementation of the new working method                                                                 |
| I have had the opportunity to speak with my immediate manager about which consequences the implementation of teams would have for me | My closest manager has given me the opportunity to speak to him/her about what consequences the implementation of the new working method will have for me |

Note: In the iLead scale, 'the new working method' can be replaced with any initiative being implemented in a local setting.

**References**

1. Kelloway EK, Mullen J, Francis L. Divergent effects of transformational and passive leadership on employee safety. *J Occup Health Psychol.* 2006;11(1):76-86.
2. Randall R, Nielsen K, Tvedt SD. The development of five scales to measure employees' appraisals of organizational-level stress management interventions. *Work Stress.* 2009;23(1):1-23.

For peer review only

## Supplementary appendix 2: Bifactor analysis to partition the variance of the multidimensional scales

### Analysis procedure

The 13 indicators of active leadership were further analysed and modelled as a bifactor model using Mplus 7.2 using maximum-likelihood estimation.<sup>1-3</sup> Bifactor models can be used to partition the variance of multidimensional scales, differentiating the variance of each indicator into a common and unique component. The unique component can then further differentiate an indicator-specific and random error component. The bifactor model was composed of one general active leadership factor (i.e., all 13 indicators loading on the same factor) and four factors signifying the implementation leadership-specific sub-factors (i.e., *exemplary behaviour*, *individualized consideration*, *intellectual stimulation*, and *contingent reward*). Thus, all items loaded on two separate factors: the general active leadership factor and one implementation leadership-specific sub-factor. These five factors were uncorrelated with each other.<sup>1</sup> Based on the standardized factor loadings, omega ( $\omega$ ), omega hierarchical ( $\omega_H$ ), and omega subscale ( $\omega_S$ ) were calculated. Omega ( $\omega$ ) estimates the amount of variance in the observed scores that is due to a common factor variance (i.e., all sources of common variance); it corresponds to coefficient alpha for the total score. Omega hierarchical ( $\omega_H$ ) estimates the amount of total score variance that can be attributed to a single common factor (i.e., active implementation leadership), whereas omega subscale ( $\omega_S$ ) indicates the proportion of the reliable score variance of indicators measuring a specific factor (i.e., exemplary behaviour, individualized consideration, intellectual stimulation and contingent reward) after the general active implementation leadership factor is controlled for.<sup>1</sup> Hence, the Omega subscale ( $\omega_S$ ) is interpreted as the reliability of a specific sub-factor after the effect of other factors is controlled for. It is recommended that  $\omega_S$  be at least .50 so that the specific sub-factor is sufficiently systematic to be interpreted separately.<sup>1</sup>

### Findings

Results from the bifactor model specifying the different variance components are presented in Table 1, where the standardized factor loadings ( $\lambda$ ) for the common factor as well as the sub-factors are given.

The model fit ( $\chi^2=25,922^*$ ,  $df=55$ ,  $RMSEA=.102$ ,  $CFI=.945$ ,  $SRMR=.033$ ) indicates mixed results, with some values above the recommended cut-off points. However, when fitting bifactor models the traditional fit indices may not be applicable, due to the use of polytomous items.<sup>4</sup> Table 1 also presents the three omega ( $\omega$ ) coefficients, which are based on the standardized factor loadings ( $\lambda$ ) retrieved from the bifactor model (see formulas 3, 4, and 6 in Reise et al., 2010<sup>1</sup>). The general active implementation factor was reliable ( $\omega$  estimate of .96), which indicates 96% of the variance in the observed scores was due to all sources of the common variance. Hence, there is a common factor showing systematic differences between individuals in active implementation leadership. The general active implementation leadership factor alone accounted for 92% of the variance ( $\omega_H=0.92$ ), whereas the sub-dimensions of active implementation leadership show very low  $\omega_H$  coefficients. Hence, the sub-factors are systematic but account for very small parts of the total variance of active implementation leadership. This interpretation is also strengthened by  $\omega_S$  estimates, which indicate the proportion of reliable score variance of indicators measuring a specific sub-factor or perspective after the general active implementation leadership factor is controlled for. None of these  $\omega_S$  values is near the cut-off value of 0.50, recommended by Reise et al., 2010.<sup>1</sup>

**Table 1.** CFA bifactor model of active implementation leadership in the iLead scale.

|            | $\lambda$ Active implementation leadership | $\lambda$ Exemplary behaviours | $\lambda$ Individualized consideration | $\lambda$ Intellectual stimulation | $\lambda$ Contingent reward |
|------------|--------------------------------------------|--------------------------------|----------------------------------------|------------------------------------|-----------------------------|
| Item 1     | .67*                                       | .37*                           |                                        |                                    |                             |
| Item 2     | .79*                                       | .20*                           |                                        |                                    |                             |
| Item 3     | .76*                                       | .45*                           |                                        |                                    |                             |
| Item 4     | .85*                                       | .06                            |                                        |                                    |                             |
| Item 5     | .84*                                       | .27*                           |                                        |                                    |                             |
| Item 6     | .70*                                       | .46*                           |                                        |                                    |                             |
| Item 7     | .80*                                       |                                | .26*                                   |                                    |                             |
| Item 8     | .74*                                       |                                | .26*                                   |                                    |                             |
| Item 9     | .83*                                       |                                |                                        | .14*                               |                             |
| Item 10    | .76*                                       |                                |                                        | -.07                               |                             |
| Item 11    | .78*                                       |                                |                                        | .62*                               |                             |
| Item 12    | .75*                                       |                                |                                        |                                    | .39*                        |
| Item 13    | .79*                                       |                                |                                        |                                    | .37*                        |
| $\omega$   | .96                                        |                                |                                        |                                    |                             |
| $\omega_H$ | .92                                        | .02                            | .002                                   | .004                               | .005                        |
| $\omega_S$ |                                            | .12                            | .08                                    | .06                                | .16                         |

Model fit:  $\chi^2=25.922^*$ ;  $df=55$ ;  $RMSEA=.102$ ;  $CFI=.945$ ;  $SRMR=.033$

## References

1. Reise SP, Moore TM, Haviland MG. Bifactor models and rotations: exploring the extent to which multidimensional data yield univocal scale scores. *J Pers Assess.* 2010;92(6):544-59.
2. Bollen KA. *Structural Equations with Latent Variables.* New York: John Wiley & Sons, Inc.; 1989.
3. Gustafsson JE. Measurement from a hierarchical point of view. In: Braun HI, Jackson DN, Wiles DE, eds. *The Role of Constructs in Psychological and Educational Measurement.* London: Lawrence Erlbaum Associates; 2002. p. 73-95.
4. West SG, Taylor AB, Wu W. Model fit and model selection in structural equation modeling. In: Hoyle RH, editor. *Handbook of structural equation modeling.* New York: Guildford Press; 2012.

# BMJ Open

## How do iLead? Validation of a Scale Measuring Active and Passive Implementation Leadership in Swedish Healthcare

|                                 |                                                                                                                                                                                                                                                                                                                                                                                                                                                                                                                                                                                                                                                                                                                                                                                                                                                                                                                                                                                                                                                                                                       |
|---------------------------------|-------------------------------------------------------------------------------------------------------------------------------------------------------------------------------------------------------------------------------------------------------------------------------------------------------------------------------------------------------------------------------------------------------------------------------------------------------------------------------------------------------------------------------------------------------------------------------------------------------------------------------------------------------------------------------------------------------------------------------------------------------------------------------------------------------------------------------------------------------------------------------------------------------------------------------------------------------------------------------------------------------------------------------------------------------------------------------------------------------|
| Journal:                        | <i>BMJ Open</i>                                                                                                                                                                                                                                                                                                                                                                                                                                                                                                                                                                                                                                                                                                                                                                                                                                                                                                                                                                                                                                                                                       |
| Manuscript ID                   | bmjopen-2018-021992.R1                                                                                                                                                                                                                                                                                                                                                                                                                                                                                                                                                                                                                                                                                                                                                                                                                                                                                                                                                                                                                                                                                |
| Article Type:                   | Research                                                                                                                                                                                                                                                                                                                                                                                                                                                                                                                                                                                                                                                                                                                                                                                                                                                                                                                                                                                                                                                                                              |
| Date Submitted by the Author:   | 17-Apr-2018                                                                                                                                                                                                                                                                                                                                                                                                                                                                                                                                                                                                                                                                                                                                                                                                                                                                                                                                                                                                                                                                                           |
| Complete List of Authors:       | Mosson, Rebecca; Karolinska Institutet, Department of Learning, Informatics, Management and Ethics, Medical Management Centre; Stockholms Lans Landsting, Centre for Epidemiology and Community Medicine, Unit for implementation and evaluation<br>von Thiele Schwarz, Ulrica; Mälardalen University, School of Health, Care and Social Welfare; Karolinska Institutet, Department of Learning, Informatics, Management and Ethics, Medical Management Centre<br>Hasson, Henna ; Karolinska Institutet, Department of Learning, Informatics, Management and Ethics, Medical Management Centre; Stockholms Lans Landsting, Centre for Epidemiology and Community Medicine, Unit for implementation and evaluation<br>Lundmark, Robert; Karolinska Institutet, Department of Learning, Informatics, Management and Ethics, Medical Management Centre<br>Richter, Anne; Karolinska Institutet, Department of Learning, Informatics, Management and Ethics, Medical Management Centre; Stockholms Lans Landsting, Centre for Epidemiology and Community Medicine, Unit for implementation and evaluation |
| <b>Primary Subject Heading</b>: | Health services research                                                                                                                                                                                                                                                                                                                                                                                                                                                                                                                                                                                                                                                                                                                                                                                                                                                                                                                                                                                                                                                                              |
| Secondary Subject Heading:      | Research methods, Medical management                                                                                                                                                                                                                                                                                                                                                                                                                                                                                                                                                                                                                                                                                                                                                                                                                                                                                                                                                                                                                                                                  |
| Keywords:                       | HEALTH SERVICES ADMINISTRATION & MANAGEMENT, Change management < HEALTH SERVICES ADMINISTRATION & MANAGEMENT, Organisational development < HEALTH SERVICES ADMINISTRATION & MANAGEMENT, Organisation of health services < HEALTH SERVICES ADMINISTRATION & MANAGEMENT, Quality in health care < HEALTH SERVICES ADMINISTRATION & MANAGEMENT                                                                                                                                                                                                                                                                                                                                                                                                                                                                                                                                                                                                                                                                                                                                                           |
|                                 |                                                                                                                                                                                                                                                                                                                                                                                                                                                                                                                                                                                                                                                                                                                                                                                                                                                                                                                                                                                                                                                                                                       |

SCHOLARONE™  
Manuscripts



## How do iLead?

# Validation of a Scale Measuring Active and Passive Implementation Leadership in Swedish Healthcare

### Authors

Rebecca Mosson<sup>1,2\*</sup>

Ulrica von Thiele Schwarz<sup>1,3</sup>

Henna Hasson<sup>1,2</sup>

Robert Lundmark<sup>1</sup>

Anne Richter<sup>1,2</sup>

### Affiliations

<sup>1</sup>Procome research group, Medical Management Centre, Department of Learning, Informatics, Management and Ethics, Karolinska Institutet, 171 77 Stockholm, Sweden

<sup>2</sup>Unit for implementation and evaluation, Centre for Epidemiology and Community Medicine (CES), Stockholm County Council, 171 29, Stockholm, Sweden

<sup>3</sup>School of Health, Care and Social Welfare, Mälardalen University, Box 883, SE 721 23 Västerås, Sweden

### Author details

**Rebecca Mosson** (\*corresponding author)

<sup>1</sup>Procome research group, Department of Learning, Informatics, Management and Ethics, Medical Management Centre, Karolinska Institutet, SE 171 77, Stockholm, Sweden

<sup>2</sup>Unit for implementation and evaluation, Centre for Epidemiology and Community Medicine, Stockholm County Council, SE 171 29, Stockholm, Sweden

Email: Rebecca.mosson@ki.se

### Ulrica von Thiele Schwarz

<sup>1</sup>Procome research group, Department of Learning, Informatics, Management and Ethics, Medical Management Centre, Karolinska Institutet, SE 171 77, Stockholm, Sweden

<sup>3</sup>School of Health, Care and Social Welfare, Mälardalen University, Box 883, SE 721 23 Västerås, Sweden

1  
2  
3  
4 Email: [ulrica.schwarz@ki.se](mailto:ulrica.schwarz@ki.se)  
5  
6  
7

### 8 **Henna Hasson**

9 <sup>1</sup>Procome research group, Department of Learning, Informatics, Management and Ethics, Medical  
10 Management Centre, Karolinska Institutet, SE 171 77, Stockholm, Sweden  
11

12 <sup>2</sup>Unit for implementation and evaluation, Centre for Epidemiology and Community Medicine,  
13 Stockholm County Council, SE 171 29, Stockholm, Sweden  
14

15  
16 E-mail: [henna.hasson@ki.se](mailto:henna.hasson@ki.se)  
17  
18

### 19 **Robert Lundmark**

20  
21 <sup>1</sup>Procome research group, Department of Learning, Informatics, Management and Ethics, Medical  
22 Management Centre, Karolinska Institutet, SE 171 77, Stockholm, Sweden  
23

24 Email: [Robert.lundmark@ki.se](mailto:Robert.lundmark@ki.se)  
25  
26  
27

### 28 **Anne Richter**

29  
30 <sup>1</sup>Procome research group, Department of Learning, Informatics, Management and Ethics, Medical  
31 Management Centre, Karolinska Institutet, SE 171 77, Stockholm, Sweden  
32

33  
34 <sup>2</sup>Unit for implementation and evaluation, Centre for Epidemiology and Community Medicine,  
35 Stockholm County Council, SE 171 29, Stockholm, Sweden  
36

37 E-mail: [anne.richter@ki.se](mailto:anne.richter@ki.se)  
38  
39  
40  
41  
42  
43

44 **Keywords:** implementation leadership, validation, scale, CFA, Full-Range Leadership Model  
45

46  
47 **Word count:** 5361  
48  
49  
50  
51  
52  
53  
54  
55

### 56 **Abstract**

57  
58  
59  
60

1  
2  
3 **Objectives:** This validation study aims to describe the creation of a scale – the iLead scale – through  
4 adaptations of existing domain-specific scales that measure active and passive implementation  
5 leadership, and to describe the psychometric properties of this scale.  
6  
7

8  
9 **Methods:** Data collected from a leadership intervention was used in this validation study.  
10 Respondents were 336 healthcare professionals (90% female and 10% male; mean age 47 years)  
11 whose first- and second-line managers participated in the intervention. The data was collected in the  
12 Stockholm regional healthcare organization that offer primary, psychiatric, rehabilitation, and acute  
13 hospital care, among other areas. The items for measuring implementation leadership were based on  
14 existent research and the Full-Range Leadership Model. Confirmatory factor analysis was performed  
15 to evaluate the dimensionality of the scale, followed by tests for reliability and convergent,  
16 discriminant and criterion-related validity using correlations and multilevel regression analyses.  
17  
18  
19  
20  
21  
22  
23  
24

25 **Results:** The final scale consists of 16 items clustered into four subscales representing active  
26 implementation leadership, and one scale signifying passive implementation leadership. Findings  
27 showed that the hypothesized model had an acceptable model fit ( $\chi^2_{(99)} = 382.864^{**}$ , CFI=.935,  
28 TLI=.911, RMSEA=.059). The internal consistency and convergent, discriminant and criterion-related  
29 validity were all satisfactory.  
30  
31  
32  
33  
34  
35

36 **Conclusions:** The iLead scale is a valid measure of implementation leadership and is a tool for  
37 understanding how active and passive leader behaviours influence an implementation process. This  
38 brief scale may be particularly valuable to apply in training focusing on facilitating implementation,  
39 and in evaluating leader training. Moreover, the scale can be useful in evaluating various leader  
40 behaviours associated with implementation success or failure.  
41  
42  
43  
44  
45  
46  
47  
48  
49

### 50 **Strengths and limitations of this study**

- 51  
52  
53 • The present study follows a rigorous validation process to explore the factor structure,  
54 reliability and validity of the iLead scale.  
55  
56  
57  
58  
59  
60

- Since the iLead scale is based on theory and other established scales, confirmatory factor analysis (CFA) was performed to confirm its suggested factor structure.
- Based on sample characteristics, the sample used for the validation represents a typical health care sample.
- Due to item deletion during the validation process, the different sub-scales in the iLead scale includes varying numbers of items.
- The response rate was moderate for the iLead scale, due to the use of a filter variable that assured that only respondents who could remember a specific implementation that their manager had led during the past six months were asked to respond to the iLead scale.

## Introduction

Implementing change in healthcare is a complex and challenging task.<sup>1,2</sup> Nonetheless, this effort is essential for keeping healthcare professionals up to date on, and ensuring their use of new research evidence so patients can receive the best possible care. Researchers have identified a wide range of contextual factors that influence effective implementation,<sup>3-5</sup> one of which is leadership.<sup>6-8</sup>

Managers' behaviours during, an implementation are crucial for effectively achieving change in practice. This is particularly true for line managers (i.e. those with a managerial position closest to employees) who have a direct influence on employees' implementation behaviours.<sup>9,10</sup> Research has recognized leadership behaviours such as being supportive, providing feedback, communicating clearly, being a role model, encouraging employee development and creating a context conforming to the implementation as essential in the implementation process (i.e., from needs assessment, preparation, implementation and to sustainability of the implementation<sup>11</sup>).<sup>7,12-14</sup> Moreover, managerial tasks, for instance planning, supervising change and providing resources, are also crucial to support implementation of change.<sup>15</sup> Both these type of person and task related behaviours are central to influence change,<sup>16-18</sup> and although some scholars make distinctions between management and leadership behaviours, others recognize that these behaviours sometimes overlap.<sup>19-21</sup> This paper does

1  
2  
3 not emphasize a distinction between management and leadership behaviours, but view both as  
4  
5 complementary processes influencing a group of individuals that are essential for successful  
6  
7 change.<sup>18,21</sup> The scale validated in this study focuses on capturing line managers' implementation-  
8  
9 specific leader behaviours – both what they do and how these actions are performed – based on the  
10  
11 active and passive dimensions of the Full-Range Leadership Model. The theoretical perspective is  
12  
13 expected to facilitate the understanding of both what managers do (e.g. provide information about the  
14  
15 implementation) and how these actions are performed (e.g. if the information is provided in a way that  
16  
17 inspires employees), thereby explaining the relationship between leadership and implementation  
18  
19 outcomes.

### 20 21 22 23 24 **The Full-Range Leadership Model**

25  
26 The Full-Range Leadership Model (FRLM) is the most comprehensively researched approach to  
27  
28 leadership.<sup>22-25</sup> The model clusters leader behaviours into two broad dimensions signifying active and  
29  
30 passive leadership.<sup>25-28</sup> Transformational leadership is one factor of active leadership<sup>25,28</sup> and is  
31  
32 associated with beneficial individual and organizational outcomes,<sup>29</sup> employee performance,<sup>30</sup> the  
33  
34 change process<sup>31,32</sup> and organizational innovation<sup>33</sup> in various contexts and cultures.<sup>34</sup> There is also  
35  
36 emerging evidence on the positive relationship between transformational leadership and effective  
37  
38 implementation.<sup>10</sup> For instance, transformational leadership has been strongly related to employees'  
39  
40 innovation implementation behaviour<sup>35</sup> and their commitment to change.<sup>36</sup> Transformational leaders  
41  
42 inspire employees to achieve higher goals and to perform at a higher level than expected. These leader  
43  
44 behaviours were originally divided into three sub-factors: *idealized influence*, acting as a role model  
45  
46 and building relationships with employees based on trust and respect; *individualized consideration*,  
47  
48 coaching of staff and helping them develop, while conveying empathy for their needs and desires; and  
49  
50 *intellectual stimulation*, encouraging employees to be creative and to challenge assumptions.<sup>28</sup>  
51  
52 *Inspirational motivation* was later added as another sub-factor to transformational leadership.<sup>20,37</sup> This  
53  
54 sub-factor concerns articulating a clear and compelling vision to employees and motivating them to  
55  
56 achieve set goals.<sup>37</sup> It has been argued that these sub-factors are related, however it has proved  
57  
58  
59  
60

1  
2  
3 problematic to distinguish between,<sup>25,37</sup> mainly through difficulties in empirically supporting  
4 discriminant validity (i.e. high intercorrelations).<sup>20,26,38,39</sup> Consequently, different approaches to  
5 conceptualize and measuring transformational leadership has been adopted. Some have measured it as  
6 a global construct,<sup>33,39</sup> whereas others have examined all individual sub-factors of transformational  
7 leadership,<sup>40,41</sup> and others have used a reduced set of factors.<sup>42</sup> It has been especially difficult to  
8 distinguish between *idealized influence* and *inspirational motivation*, both conceptually<sup>25,43</sup> and  
9 empirically.<sup>26,37,44</sup> Thus, some have combined *idealized influence* and *inspirational motivation* into one  
10 sub-factor.<sup>20,29,37,44,45</sup>

11  
12  
13  
14  
15  
16  
17  
18  
19  
20  
21 Another dimension of active leadership is *contingent reward*.<sup>26,28</sup> This sub-factor is the most active  
22 form of transactional leadership and involves an exchange relationship between manager and  
23 employees, for instance setting mutually agreed-upon goals, and follow-up and linking them to  
24 rewards. Contingent reward behaviours have been linked to employees' performance outcomes<sup>30</sup> and  
25 satisfaction.<sup>26</sup> Current suggestions are that a combination of transformational leadership and  
26 contingent reward is most effective in producing positive organizational outcomes.<sup>23,30,37,43,46</sup> Based on  
27 this, contingent reward is likely to be an important component of active implementation leadership.  
28  
29  
30  
31  
32  
33  
34  
35  
36  
37

38 Passive leadership includes two dimensions.<sup>25,27,28</sup> One of these is *passive management-by-exception*, a  
39 sub-factor of transactional leadership.<sup>27,47</sup> This refers to managerial behaviours related to acting first  
40 when something has gone wrong, or correcting employee actions when these have been brought to  
41 their attention. This sub-factor has been shown to be ineffective in achieving organizational outcomes,  
42 such as safety at work,<sup>27</sup> and to negatively impact performance.<sup>30</sup> The other passive leadership  
43 dimension is *laissez-faire leadership*, where leaders abdicate responsibility and avoid taking  
44 initiative,<sup>25</sup> which has also shown to be ineffective for achieving positive outcomes,<sup>23,27</sup> and is an  
45 overall destructive leader behaviour.<sup>48</sup> *Passive management-by-exception* and *laissez-faire leadership*  
46 have been combined in previous studies to represent a generalized passive leadership construct.<sup>25,27,34,47</sup>  
47  
48  
49  
50  
51  
52  
53  
54  
55  
56  
57  
58  
59  
60

1  
2  
3 These behaviours are typically highly correlated with each other and related to negative employee and  
4 organizational outcomes, and negatively associated with active leadership.  
5

6  
7 An additional sub-factor of the transactional leadership construct is *active management-by-exception*.<sup>47</sup>  
8  
9 This type of leader behaviour is characterized in terms of monitoring for and detecting mistakes that  
10 deviate from the norm, and taking corrective action when errors occur.<sup>20,25</sup> There is an ongoing  
11 discussion as to whether *active management-by-exception* fits into the passive or the active categories  
12 of leadership<sup>47</sup> or should be represented separately.<sup>46</sup> Some have shown that *active* and *passive*  
13 *management-by-exception* are separate constructs that are either uncorrelated, or somewhat negatively  
14 correlated.<sup>25,47</sup> Comparing *active management-by-exception* to the active leadership dimensions, it is  
15 more reactive than proactive and cannot be considered an effective leadership style. Therefore, *active*  
16 *management-by-exception* was not included in this study.  
17  
18  
19  
20  
21  
22  
23  
24  
25  
26  
27

28 To date, leadership research has mostly focused on measuring active leader behaviours to identify  
29 which ones are effective and positively influence organizational outcomes. However, capturing  
30 passive leader behaviours that negatively influence employees is also of great importance, as these can  
31 have disastrous consequences<sup>27,48,49</sup> and will most likely influence the implementation process. The  
32 research on implementation leadership has hitherto emphasized behaviours that are effective for  
33 implementing change, naturally, since these are needed to achieve implementation success. However,  
34 it is also important to consider and measure leader behaviours that may be disruptive to, and hinder, an  
35 implementation process. This is important, since the way managers lead an implementation can  
36 influence the implementation climate both positively and negatively.<sup>27,50</sup> Implementation climate  
37 involves employees' shared perceptions of an implementation initiative's practical value.<sup>51</sup> Research  
38 has demonstrated the relevance of implementation climate for the association between  
39 transformational leadership and employees' commitment to change.<sup>35</sup> Moreover, active leadership may  
40 also promote a positive implementation climate,<sup>52,53</sup> and thus influence implementation success. This  
41 highlights the importance of capturing both the active and passive aspects of leadership.<sup>25,27</sup>  
42  
43  
44  
45  
46  
47  
48  
49  
50  
51  
52  
53  
54  
55  
56  
57  
58  
59  
60

## Implementation-Specific Leadership

Recent research on leadership has indicated that leader behaviours directed at a particular initiative or objective, often referred to as domain-specific leadership,<sup>27,54,55</sup> appear to be more effective than general leader behaviours for reaching the goals of this initiative. Consequently, general active leader behaviours do not seem to be sufficient for affecting a specific domain. In the areas of occupational safety,<sup>56</sup> employee health and well-being<sup>57</sup> and service climate,<sup>55</sup> this has led to the development of domain-specific FRLM-scales. Several of these scales build on the theory of the FRLM, however specifically ask the rater to consider leader behaviours in relation to a specific domain. When implementing changes in the healthcare context, this might mean that leader behaviours directed at a specific implementation initiative might be necessary for the success of the implementation process, rather than expecting general active leadership to have an impact. Hence, general leadership may foster a good work environment and performance overall, but may be insufficient for fostering implementation success for a specific evidence-based method to improve the delivery of healthcare. It is therefore necessary to measure leader behaviours specific to an implementation process. This also means that although there is a variety of theory-based scales that measure general leadership,<sup>21</sup> these may not effectively predict the outcomes of an implementation process.<sup>58,59</sup>

To date, there is one implementation-specific leadership scale: the Implementation Leadership Scale (ILS)<sup>60</sup> measures strategic leadership in the implementation of evidence-based practices (EBPs), and assesses active leader behaviours that promote implementation of EBPs.<sup>60</sup> We argue for three main reasons to construct a new scale to measure implementation leadership. First, no scale currently exists that measures active and passive leader behaviours in relation to implementation. This is an important aspect to be included in an implementation leadership scale since passive leader behaviours can have detrimental effects on employees,<sup>27,30</sup> and consequently also for an implementation process. Second, although Aarons et al. (2014) considered the active leader behaviours of the FRLM when developing



1  
2  
3 the ILS,<sup>60</sup> the aim was to assess independent and different aspects of implementation leadership. Thus,  
4  
5 at present, no implementation leadership scale exists that operationalize the FRLM theory. We suggest  
6  
7 that a scale measuring implementation leadership and maintains the FRLM structure is important for  
8  
9 obtaining more detailed information about leader behaviours.<sup>41</sup> Third, the ILS focuses on what  
10  
11 managers do when leading implementation (e.g. developing a plan to facilitate the process) rather than  
12  
13 how it is done (e.g. whether these tasks have been performed in a way that inspires employees). We  
14  
15 suggest that an implementation leadership scale that, in addition to measuring what, measures how  
16  
17 managers lead implementation is valuable for managers in their development as an implementation  
18  
19 leader.  
20  
21  
22

23  
24 In conclusion, the aim of this study is to adapt previous domain-specific scales<sup>27,61</sup> to create and  
25  
26 validate a scale that captures managers active and passive implementation-specific leadership  
27  
28 behaviours, which follows the factor structure of the FRLM. The objective of the iLead scale is to  
29  
30 complement a previous implementation leadership scale (ILS) by capturing both effective and  
31  
32 disruptive implementation leader behaviours by basing the scale on the active and passive dimensions  
33  
34 of the FRLM, and to capture what leaders do in addition to how they perform these behaviours. Four  
35  
36 subscales are predicted for active implementation leadership and one subscale for passive  
37  
38 implementation leadership.  
39  
40  
41  
42

## 43 **Methods**

### 44 **Adapting previous domain-specific scales to construct the iLead scale**

45  
46  
47 As a first step, a literature search was performed to identify key research relating to implementation  
48  
49 leadership, including previously validated scales. This informed the decision that the scale should  
50  
51 follow the factor structure of the FRLM, thus including both active and passive leader behaviours, and  
52  
53 be adapted from existing scales. The basis for the construction of the iLead scale was two validated  
54  
55  
56  
57  
58  
59

1  
2  
3 domain-specific leadership scales.<sup>27,54</sup> We adapted the items from the scale developed by Kelloway et  
4 al. (2006),<sup>27</sup> which measures transformational and passive safety leadership and follows the factor  
5 structure of the FRLM, to be implementation specific. For instance, the original item ‘My manager  
6 shows determination to maintain a safe work environment’ was adapted to ‘My manager has shown  
7 determination to maintain the implementation of *the new working method*’. We complemented this  
8 with the subscale ‘line managers’ attitudes and actions’ from the Intervention Process Measure (IPM)  
9 by Randall et al. (2009).<sup>61</sup> This scale specifically focuses on managerial behaviours in relation to  
10 occupational health interventions and is one of the few widely used scales attempting to tap into leader  
11 behaviours that occur in conjunction with a specific health intervention. The items were adapted  
12 slightly to be applicable to the implementation area. This process resulted in a 20-item scale assessing  
13 implementation-specific leadership.  
14  
15  
16  
17  
18  
19  
20  
21  
22  
23  
24  
25  
26  
27

28 The iLead scale was developed as a tool to provide feedback for managers on their leader behaviours.  
29 This scale was applied in an implementation leadership training intervention that aims to train  
30 healthcare managers implementation leadership (the iLead intervention – please see the study protocol  
31 for further details of this intervention<sup>62</sup>), referred to as the ‘intervention’ throughout this study. It was  
32 therefore important that the scale could distinguish between different types of active and passive  
33 leader behaviours, as previously suggested.<sup>38,41</sup> Hence, a differentiation between the factors was  
34 sought. Although idealized influence and inspirational motivation may be argued to be conceptually  
35 different,<sup>37,43</sup> studies have not been able to consistently empirically separate these sub-factors.<sup>37,45</sup>  
36 Therefore, idealized influence and inspirational motivation were combined and called *exemplary*  
37 *behaviours*, which is in line with previous studies using the FRLM.<sup>20,42,44</sup> Consequently, the iLead  
38 scale measures active implementation leadership, from here on referred to as active leadership,  
39 through four subscales – the *exemplary behaviours* (7 items), *individualized consideration* (3 items),  
40 *intellectual stimulation* (5 items) and *contingent reward* (2 items). Passive implementation leadership,  
41 from here on referred to as passive leadership, comprises elements from both *passive management-by-*  
42  
43  
44  
45  
46  
47  
48  
49  
50  
51  
52  
53  
54  
55  
56  
57  
58  
59  
60

1  
2  
3 *exception* and *laissez-faire* leader behaviours (3 items), in line with a previous scale measuring  
4 domain-specific leadership<sup>19</sup>.  
5  
6  
7  
8  
9

### 10 **Assurance of content validity**

11  
12 In addition to basing the iLead items on existing scales, two additional approaches were used to assure  
13 content validity.<sup>63</sup> National experts in the field of leadership and implementation (n=5) and managers  
14 in a healthcare organization (n=40) were invited to a workshop to identify crucial implementation  
15 leader behaviours. This was performed using a structured and interactive process – the Co-created  
16 program logic (COP).<sup>64</sup> The first step was to individually brainstorm leader behaviours perceived as  
17 important in implementation, which were written on post-it notes. Thereafter, these notes with  
18 different leader behaviours were attached to a whiteboard and the participants discussed these  
19 behaviours together in groups and categorized them into overall themes. Examples of themes were:  
20 ‘inspire and motivate employees’ and ‘be responsive to employees’ needs’. The themes that emerged  
21 during this process were in line with scientific literature on effective leader behaviours when  
22 implementing change. Third, to test the face validity of the scale,<sup>63</sup> employees and senior managers  
23 (n=11) representing the healthcare organizations completed a draft of the questionnaire and were  
24 asked for oral feedback on whether the items were clearly formulated, relevant and understandable,  
25 and if they perceived that the scale measured the construct it aimed to measure. This did not lead to  
26 any major changes to the items.  
27  
28  
29  
30  
31  
32  
33  
34  
35  
36  
37  
38  
39  
40  
41  
42  
43  
44

### 45 **Participants**

46  
47  
48 The data for the present study was collected as part of an implementation leadership training  
49 intervention that was developed and evaluated in the Stockholm regional healthcare organization.<sup>62</sup>  
50 This organization offers primary, psychiatric, rehabilitation, and acute hospital care, among other  
51 areas. The data used in the present study originates from the baseline measurement (Time 1),  
52 conducted in November/December 2015, with the exception of one scale collected from the first  
53  
54  
55  
56  
57  
58  
59  
60

1  
2  
3 follow-up (Time 2) in May/June 2016 to assess predictive criterion validity. All employees whose  
4 managers were taking part in the iLead intervention and who were not on leave of absence, parental  
5 leave, had quit their job, etc. were invited to participate in the study. Employee data was used since  
6 managers' self-ratings are often inflated due to leniency bias,<sup>65,66</sup> and previous studies have  
7 demonstrated the validity of using employees' assessments of leader behaviours.<sup>67,68</sup> Out of 1,084  
8 eligible healthcare professionals, 815 responded (75% response rate) to the baseline measurement  
9 (Time 1). Of these, 336 respondents (41%) answered the iLead scale. This was because a filter was  
10 included at the beginning of the questionnaire to ensure that only respondents who could remember a  
11 specific implementation responded to questions about their manager's implementation leadership.  
12 They were instructed to replace the phrase '*the new working method*' in each question of the iLead  
13 scale with the implementation they had identified in the filter question.  
14  
15  
16  
17  
18  
19  
20  
21  
22  
23  
24  
25  
26  
27

28 The follow-up measurement was performed immediately after the implementation leadership training  
29 intervention (Time 2),<sup>62</sup> six months after the baseline measurement. The purpose of using data at Time  
30 2 was to assess the predictive type of criterion validity (i.e. using a criterion that occurs in the  
31 future).<sup>63</sup> Thus, data on implementation climate was used since active leadership is an important  
32 predictor of a positive implementation climate.<sup>51,53</sup> A total of 490 respondents answered the  
33 questionnaire at Time 2, and 443 (90%) of these answered all the implementation climate items.  
34  
35  
36  
37  
38  
39  
40  
41  
42

43 The majority of respondents were female (90%) and had worked at their current job for two to five  
44 years (26.8 %). All the managers were female. This is representative of the healthcare context in  
45 Sweden.<sup>69</sup> The participants' mean age was 47 years (SD=11.8; Range: 22 – 65). Most participants,  
46 79.6%, had obtained a university degree; 18.7% had finished high school; and 1.7% had no further  
47 education, i.e. lower than a high school education.  
48  
49  
50  
51  
52  
53  
54  
55

## 56 Procedure

1  
2  
3 The respondents received a secured link to an electronic questionnaire through their work e-mail,  
4 including information about the study and the purpose of the questionnaire. Two reminders were sent,  
5 with a two-week time interval. All participants provided informed consent that their data could be used  
6 in research, and confirmed that they understood that participation was voluntary and that they could  
7 withdraw their participation at any time. The local ethics committee in Stockholm (ref no. 2015/857-  
8 31/5) approved the data collection for the project.  
9  
10  
11  
12  
13  
14  
15  
16  
17

### 18 **Patient and public involvement**

19  
20 Important stakeholders (national experts, line managers and employees) were involved in this study as  
21 described above (see Assurance of content validity). Patient's involvement was not applicable in this  
22 study.  
23  
24  
25  
26  
27  
28  
29

### 30 **Measures**

31  
32 *Implementation-specific active and passive leadership* was measured through the iLead scale  
33 (described above). All 20 items were scored on a 1 (strongly disagree) to 5 (strongly agree) Likert  
34 scale.  
35  
36  
37  
38  
39  
40

#### 41 *Convergent and discriminant validity measures*

42  
43 *General transformational leadership* was measured through the Global Transformational Leadership  
44 (GTL) scale<sup>39</sup> using seven items. An example item is: 'My closest manager communicates a clear and  
45 positive vision of the future'. Items were scored on a 1 (strongly disagree) to 5 (strongly agree) Likert  
46 scale. Cronbach's alpha was .95.  
47  
48  
49  
50

51  
52 *General transactional leadership* was measured through two items used in previous research that are  
53 based on the Multifactor Leadership Questionnaire (MLQ), modified to be implementation-  
54 specific.<sup>25,27</sup> The items focus on contingent reward behaviours, for example: "My manager shows  
55  
56  
57  
58  
59  
60

1  
2  
3 satisfaction when employees meet expectations”. Items were scored on a 1 (strongly disagree) to 5  
4 (strongly agree) Likert scale. Cronbach’s alpha was .81.  
5  
6  
7  
8  
9

#### 10 *Criterion-related validity measure*

11  
12 *Implementation climate* was measured with three items derived from the subscale ‘Focus on EBP’ of  
13 the Implementation Climate Scale (ICS)<sup>51</sup> (collected at Time 2). These items were deemed relevant for  
14 assessing implementation climate due to their specific nature, and were therefore adapted to the  
15 present study. For example, “Using evidence-based practices is a top priority in this team/agency” was  
16 changed to “At my workplace it is a top priority to change our working methods in order to achieve  
17 the best possible quality”. Items were scored on a 1 (strongly disagree) to 5 (strongly agree) Likert  
18 scale. Cronbach’s alpha was .86.  
19  
20  
21  
22  
23  
24  
25  
26  
27  
28

#### 29 **Statistical analyses**

30  
31 Two major approaches were used to validate the scale.<sup>63</sup> Its dimensionality was evaluated through  
32 confirmatory factor analysis (CFA) using AMOS 23. CFA was chosen over an exploratory factor  
33 analysis (EFA) since the factor structure of the implementation-specific scale (i.e. FRLM) is well  
34 established in the literature and has prior validity evidence.<sup>20,26,70,71</sup> This is also in line with previous  
35 studies of domain-specific scales based on the FRLM.<sup>27</sup> Thus, CFA is used to deductively confirm that  
36 the data in the present study fits into the already proposed factor structure, whereas an EFA is more  
37 inductive in its approach and should be used when developing new scales with items that have not  
38 been tested in terms of reliability and validity.<sup>72</sup> The maximum likelihood estimation (ML) approach  
39 was used to address missing data values.<sup>73</sup> One path indicator for each latent variable was fixed to set  
40 the scale of the latent variable. Model fit was assessed using several fit indices, including the chi-  
41 square ( $\chi^2$ ), the comparative fit index (CFI), the Tucker-Lewis index (TLI), and the root mean square  
42 error residual (RMSEA).<sup>73,74</sup> The following approximate cut-off criteria were used, whereby CFI and  
43 TLI around .90<sup>73</sup> and a RMSEA value of  $\leq .06$ <sup>74</sup> indicate a good fit to the data.<sup>75</sup> Information criteria  
44  
45  
46  
47  
48  
49  
50  
51  
52  
53  
54  
55  
56  
57  
58  
59  
60

1  
2  
3 such as the Akaike information criterion (AIC) and the chi-square difference test were used for model  
4 comparison, whereby a model with a lower value indicates a more acceptable model fit.<sup>73</sup>  
5  
6  
7  
8  
9

10 First, item characteristics, such as comments from participants or factor loadings, were considered to  
11 identify items for exclusion. Following this, five competing models were compared to test the  
12 hypothesized factor structure of the scale.<sup>73,76</sup> In line with previous research, a second-order factor  
13 model is proposed for the active implementation leadership factors due to high factor  
14 correlations.<sup>25,39,44</sup> The chi-square difference test was used to identify the best fitting model. Moreover,  
15 additional rigorous tests were performed by analysing a bifactor model to partition the variance of the  
16 multidimensional scales. Findings from the bifactor model were in line with the results from the CFA.  
17  
18  
19  
20  
21  
22  
23  
24  
25  
26

27 Second, the reliability of each subscale was assessed via internal consistency (Cronbach's alpha).<sup>63</sup>  
28 Convergent validity of implementation leadership was then analysed. Here, our scale was correlated  
29 with theoretically similar instruments,<sup>63,76</sup> such as general transformational<sup>39</sup> and transactional  
30 leadership.<sup>25,27</sup> Correlations should be higher than .40.<sup>77</sup> Discriminant validity was tested through the  
31 correlation of passive implementation leadership with general transformational and transactional  
32 leadership. For this, passive leadership was correlated with two constructs to which it should be  
33 negatively related.<sup>63</sup> Lastly, the criterion-related validity<sup>63,76</sup> was examined by performing regression  
34 models with implementation climate at Time 2 as the outcome, which is a theoretical outcome of  
35 implementation leadership.<sup>52,53</sup> Multilevel modelling was used to account for the nestedness of the data  
36 (employees nested in workgroups) using Mplus 7.2 and maximum-likelihood estimation.<sup>78</sup> All  
37 predictors were grand-mean centred before being entered in the model.<sup>79</sup> We expect a positive  
38 relation between active leadership at Time 1 and implementation climate at Time 2 when age, gender  
39 and education are controlled for. These relations were modelled on the individual level (Level 1).  
40  
41  
42  
43  
44  
45  
46  
47  
48  
49  
50  
51  
52  
53  
54  
55

## 56 **Results**

57  
58  
59  
60

### Examination of items and dimensionality

Initial examination of the items when conducting the CFA resulted in the removal of four of the 20 items. These items either did not capture the intended construct (factor loading < .4) or had low correlations ( $r < .3$ ) with other items of the same construct,<sup>80</sup> and one of them was excluded due to participants commenting that it was difficult to understand, and thus to answer. Consequently, 16 items were included for all further calculations.

To investigate the dimensionality of the scale (i.e. whether the subscales can be separated from each other), five competing models were compared. Description of the models and findings from these model comparisons are presented in Table 1. The results from the CFA showed that Model 1, our hypothesized model with four active implementation leadership subscales, was the best fitting model. That is, Models 2, 3, 4 and 5 fit the data significantly worse than Model 1, which had an acceptable model fit ( $\chi^2_{(99)} = 382.864^{**}$ , CFI=.935, TLI=.911, RMSEA=.059). Figure 1 displays the standardized factor loadings of this model.

**Table 1.** Model comparisons.

| Models  | $\chi^2$   | df  | CFI  | TLI  | RMSEA | AIC      | Model comparison | $\Delta$ df | $\Delta \chi^2$ |
|---------|------------|-----|------|------|-------|----------|------------------|-------------|-----------------|
| Model 1 | 382.864**  | 99  | .935 | .911 | .059  | 488.864  |                  |             |                 |
| Model 2 | 388.906**  | 100 | .934 | .911 | .060  | 492.906  | 1 vs 2           | 1           | 6.04*           |
| Model 3 | 452.720**  | 101 | .920 | .892 | .065  | 554.720  | 2 vs 3           | 1           | 63.81**         |
| Model 4 | 501.158**  | 103 | .909 | .880 | .069  | 599.158  | 3 vs 4           | 2           | 48.44**         |
| Model 5 | 1655.889** | 170 | .740 | .678 | .104  | 1775.889 | 4 vs 5           | 67          | 1154.73**       |

Notes: N=336; \*\* p < 0.01; \* p < 0.05.

*Model 1:* exemplary behaviours (EB), individualized consideration (IC), intellectual stimulation (IS), and contingent reward (CR) were included as four first-order factors under one second-order factor for active leadership (AL), and passive leadership (PL) was intercorrelated with AL; *Model 2:* IC and IS were collapsed into one factor, resulting in three first-order factors for the AL second-order factor, and PL was intercorrelated with AL; *Model 3:* EB, IC and IS were collapsed into one factor, resulting in two first-order factors for the AL second-order factor, and PL was intercorrelated with AL; *Model 4:* all the active factors (transformational leadership sub-factors and CR) were collapsed into one first-order factor, and PL was intercorrelated with AL; *Model 5:* all items loaded on one single factor.

--- Figure 1 about here ---



Hence, the final scale includes 16 items representing four active leadership subscales (i.e., *exemplary behaviours* (6 items), *individualized consideration* (2 items), *intellectual stimulation* (3 items), and *contingent reward* (2 items) and passive leadership (3 items). Internal consistency was considered satisfactory for all subscales ( $\alpha > .70^{63}$ ). The final iLead scale, its constituent items, and internal consistency of the subscales are presented in Table 2.

**Table 2.** The iLead scale and internal consistency of subscales.

| Scales and constituent items                                                                                                              | $\alpha$   | Item no. |
|-------------------------------------------------------------------------------------------------------------------------------------------|------------|----------|
| <b>1. Active implementation leadership</b>                                                                                                | <b>.95</b> |          |
| <b>1a. Exemplary behaviours</b>                                                                                                           | <b>.92</b> |          |
| <i>My closest manager...</i>                                                                                                              |            |          |
| ...has shown determination to maintain the new working method                                                                             |            | 1        |
| ...has talked about his/her values and beliefs of why it is important to work according to the new working method                         |            | 2        |
| ...has actively worked towards implementing the new working method                                                                        |            | 3        |
| ...has continuously encouraged us in the implementation of the new working method                                                         |            | 4        |
| ...has behaved in a way that explicitly displays commitment to working according to the new working method                                |            | 5        |
| ...has been positive towards the implementation of the new working method                                                                 |            | 6        |
| <b>1b. Individualized consideration</b>                                                                                                   | <b>.80</b> |          |
| <i>My closest manager...</i>                                                                                                              |            |          |
| ...has spent time showing me how I can work according to the new working method                                                           |            | 7        |
| ...has given me the opportunity to speak to him/her about what consequences the implementation of the new working method will have for me |            | 8        |
| <b>1c. Intellectual stimulation</b>                                                                                                       | <b>.83</b> |          |
| <i>My closest manager...</i>                                                                                                              |            |          |
| ...has done a lot to involve us in the implementation of the new working method                                                           |            | 9        |
| ...has encouraged me to express my ideas and opinions about implementing the new working method                                           |            | 10       |
| ...has shared whatever information he/she has about the implementation of the new working method                                          |            | 11       |
| <b>1d. Contingent reward</b>                                                                                                              | <b>.85</b> |          |
| <i>My closest manager...</i>                                                                                                              |            |          |
| ...has shown satisfaction when I work according to the new working method                                                                 |            | 12       |
| ...has shown appreciation when we have achieved our goals to implement the new working method at our workplace                            |            | 13       |
| <b>2. Passive implementation leadership</b>                                                                                               | <b>.91</b> |          |
| <i>My closest manager...</i>                                                                                                              |            |          |
| ...has avoided to intervene until major problems with the implementation of the new working method have arisen                            |            | 14       |
| ...has waited for things to go wrong with the implementation of the new working method before taking any action                           |            | 15       |
| ...has avoided making decisions that affect the implementation of the new working method                                                  |            | 16       |

Notes: N=324–336, due to missing data on some items (pairwise deletion).

### *Convergent and discriminant validity*

Bivariate correlations of all the measures in the present study and descriptive statistics are presented in Table 3. To assess convergent validity, the correlations between active leadership and general transformational and transactional leadership were calculated. Correlations between the sub-factors of active and general transformational leadership ( $r=.70 - .78^{**}$ ) and transactional leadership ( $r=.61 -$

.70\*\*) were high, supporting convergent validity. To assess discriminant validity, the correlations between passive leadership and general transformational and transactional leadership were calculated, showing a correlation of  $r = -.22^{**}$  with general transformational leadership and a correlation of  $r = -.18^{**}$  with transactional leadership. These results support discriminant validity.

**Table 3.** Bivariate correlations of study measures.

| Scales                                 | Mean | SD   | 1a     | 1b    | 1c     | 1d     | 2      | 3     | 4     | 5 |
|----------------------------------------|------|------|--------|-------|--------|--------|--------|-------|-------|---|
| 1. Active implementation leadership    | 3.84 | 0.88 |        |       |        |        |        |       |       |   |
| 1a. Exemplary behaviours               | 4.06 | 0.86 |        |       |        |        |        |       |       |   |
| 1b. Individualized consideration       | 3.60 | 1.10 | .73**  |       |        |        |        |       |       |   |
| 1c. Intellectual stimulation           | 3.87 | 0.93 | .87**  | .84** |        |        |        |       |       |   |
| 1d. Contingent reward                  | 3.84 | 0.97 | .75**  | .71** | .76**  |        |        |       |       |   |
| 2. Passive implementation leadership   | 2.01 | 1.17 | -.20** | -.12* | -.20** | -.17** |        |       |       |   |
| 3. General transformational leadership | 3.87 | 0.93 | .77**  | .70** | .78**  | .70**  | -.22** |       |       |   |
| 4. General transactional leadership    | 3.79 | 0.97 | .68**  | .64** | .70**  | .61**  | -.18** | .86** |       |   |
| 5. Implementation climate              | 3.92 | 0.92 | .34**  | .37** | .27**  | .45**  | -.17*  | .44** | .44** |   |

Notes: N=158–649, due to missing data on some items (pairwise deletion); \*\*  $p < 0.01$ . \*  $p < 0.05$ . Data was collected at Time 1 for all measures, except for Implementation climate, which was collected at Time 2.

#### *Criterion-related validity*

Criterion-related validity was tested by examining the relationship between implementation climate (measured at Time 2) and active and passive leadership at Time 1. In line with expectations, findings show that when age, gender and education were controlled for, active leadership significantly predicted implementation climate ( $B = .40^*$ ). A slight negative relation that was not statistically significant ( $B = -.07$ ) was observed between passive leadership and implementation climate (Table 4).

**Table 4.** Multilevel regressions: Implementation climate regressed on age, gender, education, and active and passive implementation leadership.

|                                   | Model 1      | Model 2     |
|-----------------------------------|--------------|-------------|
| Predictor variables               | B (SE)       | B (SE)      |
| Age                               | .009* (.004) | -.01* (.01) |
| Gender (women)                    | .14 (.15)    | .07 (.16)   |
| University education              | -.10 (.15)   | .06 (.17)   |
| Active implementation leadership  |              | .40* (.08)  |
| Passive implementation leadership |              | -.07 (.05)  |

Notes: \*  $p < 0.05$ ; ICC=.15

## **Discussion**

1  
2  
3 The aim of the present study was to adapt previous domain-specific scales to create and validate an  
4 active and passive implementation-specific leadership scale that follows the factor structure of the  
5 FRLM – the iLead scale. The analyses supported good psychometric properties for the scale. Thus, the  
6 iLead scale can be used to assess how managers lead an implementation. This scale complements the  
7 knowledge about what leaders do and meets the need for a scale linking implementation leadership  
8 with theory. This is essential for uncovering how day-to-day leadership affects the implementation  
9 process.  
10  
11  
12  
13  
14  
15

16  
17  
18  
19 The predicted four subscales for active leadership and the scale for passive leadership were confirmed  
20 through CFA. Thus, analysis supports the existence of two distinct dimensions: active and passive  
21 leadership. As specified, active leadership was differentiated into four sub-factors: *exemplary*  
22 *behaviours*, *intellectual stimulation*, *individualized consideration* and *contingent reward* with a  
23 common second-order factor representing active leadership. This indicates that even though different  
24 sub-factors could be distinguished, they were all highly related, as captured in the second-order factor  
25 (i.e. active leadership). This is in line with previous studies in which a second-order factor has been  
26 used to capture the correlation between the sub-factors.<sup>26,39,44</sup> These findings were also confirmed by  
27 the bifactor model. This analysis showed that the common factor of active leadership explained a large  
28 part of the variance, with a unique contribution of each of the four subscales. Similar to other  
29 theoretical constructs (e.g., intelligence or self-rated productivity), this means that each subscale  
30 reflects the common factor of active leadership to a larger extent than it reflects the subscales and  
31 should not be analysed independently without the common factor (see Supplementary appendix).  
32 Nevertheless, since each sub-factor contributes with unique variance, they should still be distinguished  
33 in the model, and they can be used in the context of providing actionable feedback to managers in  
34 leadership training.<sup>25,34,41</sup> In this context, the level of detail provided through the subscales help  
35 distinguish which specific sub-type of leader behaviours that need to improve. Thus, the iLead scale  
36 can be used in implementation training, for example to provide leaders with feedback and to evaluate  
37 the training, in addition to the research context.  
38  
39  
40  
41  
42  
43  
44  
45  
46  
47  
48  
49  
50  
51  
52  
53  
54  
55  
56  
57  
58  
59  
60

1  
2  
3  
4  
5 As anticipated, findings demonstrated that the passive leadership dimension is empirically distinct  
6 from, although correlated with, the active one. This indicates that having a scale that represents the  
7 continuum of leader behaviours in the same structural model is feasible for capturing both effective  
8 and ineffective leader behaviours. In the present study, *passive management-by-exception* and *laissez-*  
9 *faire* items represent the passive domain, considering their ineffective styles.<sup>25,27</sup> To date, most  
10 research has focused on active leader behaviours,<sup>22,23</sup> despite the fact that both active and passive  
11 leader behaviours influence employees and organizational outcomes.<sup>25,27,30</sup> However, the importance  
12 of also considering passive leader behaviours is receiving more research attention.<sup>27,28</sup> For instance, a  
13 study investigating the impact of safety-specific transformational and passive leadership on safety  
14 outcomes demonstrated that the safety-specific passive leader behaviours had a negative effect on  
15 outcomes (i.e. increased injury).<sup>27</sup> Thus far, implementation research has not focused on assessing  
16 ineffective leader behaviours or investigated their influence on an implementation process. Through  
17 the creation of the iLead scale, there is now an approach to assess not only active, but also passive  
18 leadership within the implementation context. This is an important next step, since passive behaviours  
19 may actually have a negative impact when implementing change. The present study thereby adds to  
20 existing knowledge of the overall effect of leadership on the implementation process. Consequently,  
21 the iLead scale complements the existing Implementation Leadership Scale (ILS), which focuses on  
22 measuring active implementation leadership.  
23  
24  
25  
26  
27  
28  
29  
30  
31  
32  
33  
34  
35  
36  
37  
38  
39  
40  
41  
42  
43

44 The validity of the iLead scale was evaluated by investigating how it relates to other  
45 measurements.<sup>63,76</sup> Findings confirmed expected negative relations between the passive leadership and  
46 general transformational<sup>39</sup> and transactional leadership.<sup>25,27</sup> Moreover, the expected positive relations  
47 between active implementation leadership with the general leadership scales were confirmed with  
48 moderate to high correlations. This indicates that these measures belong to a similar latent construct,  
49 but that the iLead scale also captures certain unique aspects of leadership. Furthermore, active  
50 leadership predicted a higher implementation climate over time, whereas passive leadership was not  
51  
52  
53  
54  
55  
56  
57  
58  
59  
60

1  
2 significantly associated with implementation climate. This finding contradicts previous research that  
3 has found a negative correlation with passive leadership and specific climate.<sup>27</sup> Thus, this should be  
4 further explored in future studies. That active leadership predicts implementation climate is in line  
5 with implementation frameworks summarizing the process of implementation, for instance the  
6 Exploration, Preparation, Implementation and Sustainment (EPIS) model.<sup>81</sup> According to EPIS, active  
7 leadership should ultimately result in a favourable climate at the workplace, with employees  
8 perceiving implementation as part of the daily routine. These predictions have been confirmed in  
9 several empirical studies.<sup>50,82</sup>

10  
11  
12  
13  
14  
15  
16  
17  
18  
19  
20  
21 A methodological aspect worth mentioning is that only those employees who could remember a  
22 specific implementation effort conducted at their workplace during the past six months were asked to  
23 respond to the iLead scale. Therefore, only 41% of the 815 eligible respondents answered the iLead  
24 scale. This aspect is perceived as informative, since leadership research has previously been criticized  
25 for assuming that employees have actually witnessed, and can therefore rate, the behaviour of their  
26 manager, which is not always the case.<sup>83</sup> Thus, to be particularly restrictive in evaluating this new  
27 measure, a filter variable was included in the questionnaire to ensure that employees actually had valid  
28 knowledge of their manager's implementation leader behaviour. It may be argued that those who  
29 answered these questions were those who could make a proper judgement about their manager's  
30 implementation leadership. The sample size was nonetheless still sufficient, as there were at least ten  
31 times more raters than questionnaire items in the analyses.<sup>73</sup>

32  
33  
34  
35  
36  
37  
38  
39  
40  
41  
42  
43  
44  
45  
46  
47 The scale did not include *active management-by-exception* from the FRLM, which is described as the  
48 leader looking for mistakes and enforcing rules to avoid these mistakes.<sup>25</sup> This was a result of certain  
49 problems associated with this construct. For instance, the operationalization of *active management-by-*  
50 *exception* is specifically troublesome since it often focuses only on negative control behaviours, such  
51 as stopping behaviours.<sup>56</sup> This is despite the fact that it theoretically also includes positive control  
52  
53  
54  
55  
56  
57  
58  
59  
60

1  
2  
3 behaviours, such as monitoring and enforcing policies and routines, which show that the specific  
4 objective (e.g. implementation or safety) is an enacted priority.<sup>56</sup> Moreover, the reliability of subscales  
5 aiming to capture *active management-by-exception* has been problematic.<sup>30</sup> Research has also  
6 indicated that it is primarily transformational leadership and contingent reward that result in positive  
7 effects.<sup>25,30</sup> Consequently, the *active management-by-exception* factor was excluded from the iLead  
8 scale, which only incorporates the FRLM leadership dimensions that can be clearly distinguished into  
9 an overall active or passive implementation leadership category. This is in line with previously  
10 developed scales.<sup>27,54</sup>

11  
12  
13  
14  
15  
16  
17  
18  
19  
20  
21 Only three items were included to measure passive leadership. Although it is crucial to capture leader  
22 behaviours that may hinder an implementation process (passive leadership), it is even more valuable to  
23 capture those that have a positive effect on, and promote successful, implementation (active  
24 leadership), especially when using the scale in a leadership intervention as a source of feedback.  
25 Moreover, some sub-factors are represented by fewer than the recommended three items for new  
26 scales.<sup>84</sup> However, the iLead scale is based on the FRLM and previous domain-specific scales. In  
27 addition, there are examples of brief and even single-items scales that have good psychometric  
28 properties.<sup>63</sup> With the healthcare setting in mind when tailoring and creating the iLead scale, the  
29 ambition was to make it as pragmatic and feasible as possible to use in practice.<sup>85</sup> Thus, the iLead  
30 scale is a brief, concise, and broadly applicable scale that may be used in the daily practice where  
31 continuous implementations are performed to improve patient outcomes.

## 32 33 34 35 36 37 38 39 40 41 42 43 44 45 46 47 **Conclusions**

48  
49 This study describes a scale with good psychometric properties for measuring active and passive  
50 implementation leadership – the iLead scale. Including these aspects is relevant since both active and  
51 passive leader behaviours may influence employees' performance throughout an implementation  
52 process. More explicitly, the scale measures both what leaders do as well as how they perform these  
53  
54  
55  
56  
57  
58  
59  
60

1  
2 actions, through *exemplary behaviour, individualized consideration, intellectual stimulation and*  
3 *contingent reward, and passive behaviours*. The iLead scale is based on the most widely applied  
4 leadership model, the FRLM, which makes the results relatable to a vast amount of research based on  
5 this theory. It also measures implementation-specific leadership in contrast to general leadership.  
6  
7 Domain-specific leadership is associated with being more predictive for specific outcomes, such as  
8 implementation success, than general leadership. Thus, the iLead scale is a valid tool that can be used  
9  
10 to understand how leader behaviours influence implementation success, and may be particularly  
11 valuable to apply in training implementation and evaluating leader training.  
12  
13  
14  
15  
16  
17  
18  
19  
20  
21

## 22 **Abbreviations**

23  
24 CFA: Confirmatory Factor Analysis

25  
26 COP: Co-created program theory

27  
28 EBP: Evidence-Based Practice

29  
30 FRLM: The Full-Range Leadership Model  
31  
32  
33  
34  
35  
36  
37

## 38 **Ethics approval and consent to publish**

39 Ethical approval for the data collection was obtained from the local ethics committee in Stockholm,  
40 Sweden (ref no. 2015/857-31/5). Informed consent has been obtained from all participants included in  
41 the present study.  
42  
43  
44  
45  
46  
47

## 48 **Consent for publication**

49 Not applicable.  
50  
51  
52  
53  
54  
55

## 56 **Data sharing statement**

1  
2  
3 This study presents all the items used to measure implementation leadership. Please contact the  
4  
5 corresponding author for data requests.  
6  
7  
8  
9

### 10 **Competing interests**

11  
12 The authors declare that they have no competing interests.  
13  
14

### 15 **Funding**

16  
17 This study is part of a project that has received research grant funding from AFA Insurance (project  
18  
19 no. 140114) after competitive peer review. AFA Insurance is one of the largest nationally recognized  
20  
21 Swedish research agencies funding research on work environment and health. The funder did not have  
22  
23 any role in the design of the project.  
24  
25  
26  
27  
28  
29

### 30 **Authors' contributions**

31  
32 RM, AR, UvTS, HH and RL contributed to the theoretical background and study design. RM, AR,  
33  
34 UvTS and HH contributed to the item development. RM performed the data analysis, with  
35  
36 contributions from AR. For the present article, RM drafted the first version. All other authors  
37  
38 contributed to writing and editing all parts of the article. All authors have approved the final version.  
39  
40  
41  
42

### 43 **Acknowledgements**

44  
45 The authors would like to extend special thanks to the employees who answered the questionnaire,  
46  
47 thus making this study possible.  
48  
49  
50  
51

### 52 **Author details**

53  
54 <sup>1</sup> Procome Research Group, Medical Management Centre, Department of Learning, Informatics,  
55  
56 Management and Ethics, Karolinska Institutet, 171 77 Stockholm, Sweden.  
57  
58  
59  
60



<sup>2</sup> Unit for Implementation, Centre for Epidemiology and Community Medicine (CES), Stockholm County Council, 171 29 Stockholm, Sweden.

<sup>3</sup> School of Health, Care and Social Welfare, Mälardalen University, Box 883, SE 721 23 Västerås, Sweden

## References

1. Grimshaw JM, Eccles MP, Lavis JN, Hill SJ, Squires JE. Knowledge translation of research findings. *Implement Sci.* 2012;7:50.
2. Grol R, Grimshaw J. From best evidence to best practice: effective implementation of change in patients' care. *Lancet.* 2003;362(9391):1225-30.
3. Damschroder LJ, Aron DC, Keith RE, Kirsh SR, Alexander Ja, Lowery JC. Fostering implementation of health services research findings into practice: a consolidated framework for advancing implementation science. *Implement Sci.* 2009;4:50.
4. Squires JE, Graham ID, Hutchinson AM, Michie S, Francis JJ, Sales A, et al. Identifying the domains of context important to implementation science: a study protocol. *Implement Sci.* 2015;10:135.
5. Rycroft-Malone J. The PARIHS framework--a framework for guiding the implementation of evidence-based practice. *J Nurs Care Qual.* 2004;19(4):297-304.
6. Greenhalgh T, Robert G, Macfarlane F, Bate P, Kyriakidou O. Diffusion of innovations in service organizations: systematic review and recommendations. *Milbank Q.* 2004;82(4):581-629.
7. Ovreteit J. Improvement leaders: what do they and should they do? A summary of a review of research. *Qual Saf Health Care.* 2010;19(6):490-2.
8. Stetler C, Ritchie J, Rycroft-Malone J, Schultz A, Charns M. Institutionalizing evidence-based practice: an organizational case study using a model of strategic change. *Implement Sci.* 2009;4(1):78.
9. Birken SA, Lee SY, Weiner BJ. Uncovering middle managers' role in healthcare innovation implementation. *Implement Sci.* 2012;7:28.

10. Aarons GA, Ehrhart MG, Farahnak LR, Hurlburt MS. Leadership and organizational change for implementation (LOCI): a randomized mixed method pilot study of a leadership and organization development intervention for evidence-based practice implementation. *Implement Sci.* 2015;10(1):11.
11. Fixsen DL, Naoom, SF, Blase, KA, Friedman, RM, Wallace, F. Implementation Research: A Synthesis of the Literature. *Tampa, FL: University of South Florida, Louis de la Parte Florida Mental Health Institute, The National Implementation Research Network (FMHI Publication #231)*. 2005.
12. Gifford W, Davies B, Edwards N, Griffin P, Lybanon V. Managerial leadership for nurses' use of research evidence: an integrative review of the literature. *Worldv Evid-Based Nu.* 2007;4(3):126-45.
13. Reichenpfader U, Carlford S, Nilsen P. Leadership in evidence-based practice: a systematic review. *Leadersh Health Serv.* 2015;28(4):298-316.
14. Avolio BJ, Walumbwa FO, Weber TJ. Leadership: current theories, research, and future directions. *Annu Rev Psychol.* 2009;60:421-49.
15. Battilana J, Gilmartin M, Sengul M, Pache A-C, Alexander JA. Leadership competencies for implementing planned organizational change. *Leadership Q.* 2010;21(3):422-438.
16. Bass BM. From transactional to transformational leadership: Learning to share the vision. *Organ Dyn.* 1990;18(3):19-31.
17. Nadler DA, Tushman ML. The organization of the future: Strategic imperatives and core competencies for the 21st century. *Organ Dyn.* 1999;28(1):45-60.
18. Kotter JP. What leaders really do. *Harvard Business Review.* 1990;79(11):103-111.
19. Zaccaro SJ, Horn ZNJ. Leadership theory and practice: Fostering an effective symbiosis. *Leadership Q.* 2003;14(6):769-806.
20. Yukl G. Leadership in Organizations. 6<sup>th</sup> ed. New Jersey: Pearson Higher Education; 2005.
21. Northouse P. Leadership: Theory and Practice. 5<sup>th</sup> ed: SAGE Publications, Inc; 2010.
22. Lowe KB, Gardner WL. Ten years of The leadership quarterly: contributions and challenges for the future. *Leadersh Q.* 2000;11(4):459-514.

- 1
- 2
- 3 23. Judge TA, Piccolo RF. Transformational and transactional leadership: a meta-analytic test of their
- 4 relative validity. *Journal Appl Psychol*. 2004;89(5):755-68.
- 5
- 6 24. Antonakis J, House RJ. Instrumental leadership: measurement and extension of transformational–
- 7 transactional leadership theory. *Leadership Q*. 2014;25(4):746-71.
- 8
- 9 25. Avolio J, Bass B, Jung D. Re-examining the components of transformational and transactional
- 10 leadership using the multifactor leadership questionnaire. *J Occup Organ Psychol*. 1999;72:441 -
- 11 62.
- 12
- 13 26. Bycio P, Hackett RD, Allen JS. Further assessments of Bass's (1985) conceptualization of
- 14 transactional and transformational leadership. *Journal Appl Psychol*. 1995;80(4):468-78.
- 15
- 16 27. Kelloway EK, Mullen J, Francis L. Divergent effects of transformational and passive leadership
- 17 on employee safety. *J Occup Health Psychol*. 2006;11(1):76-86.
- 18
- 19 28. Bass BM. *Leadership and Performance Beyond Expectations*. New York: Free Press; 1985.
- 20
- 21 29. Barling J, Weber T, Kelloway EK. Effects of transformational leadership training on attitudinal
- 22 and financial outcomes: a field experiment. *Journal Appl Psychol*. 1996;81(6):827-32.
- 23
- 24 30. Bass BM, Avolio BJ, Jung DI, Berson Y. Predicting unit performance by assessing
- 25 transformational and transactional leadership. *Journal Appl Psychol*. 2003;88(2):207-18.
- 26
- 27 31. Eisenbach R, Watson K, Pillai R. Transformational leadership in the context of organizational
- 28 change. *J Organ Chang Manag*. 1999;12(2):80-9.
- 29
- 30 32. Holten A-L, Brenner SO. Leadership style and the process of organizational change. *Leadership*
- 31 *Org Dev J*. 2015;36(1):2-16.
- 32
- 33 33. Jung DI, Chow C, Wu A. The role of transformational leadership in enhancing organizational
- 34 innovation: Hypotheses and some preliminary findings. *Leadership Q*. 2003;14(4–5):525-44.
- 35
- 36 34. Den Hartog DN, House RJ, Hanges PJ, Ruiz-Quintanilla SA, Dorfman PW. Culture specific and
- 37 cross-culturally generalizable implicit leadership theories: Are attributes of
- 38 charismatic/transformational leadership universally endorsed? *Leadership Q*. 1999;10(2):219-56.
- 39
- 40 35. Michaelis B, Stegmaier R, Sonntag K. Shedding light on followers' innovation implementation
- 41 behavior. *J Manage Psychol*. 2010;25(4):408-29.
- 42
- 43
- 44
- 45
- 46
- 47
- 48
- 49
- 50
- 51
- 52
- 53
- 54
- 55
- 56
- 57
- 58
- 59
- 60

- 1  
2  
3 36. Herold DM, Fedor DB, Caldwell S, Liu Y. The effects of transformational and change leadership  
4 on employees' commitment to a change: a multilevel study. *J Appl Psychol*. 2008;93(2):346-57.  
5  
6  
7 37. Barbuto JE. Motivation and transactional, charismatic, and transformational leadership: a test of  
8 antecedents. *JLOS*. 2005;11(4):26-40.  
9  
10 38. Hardy L, Arthur CA, Jones G, Shariff A, Munnoch K, Isaacs I, et al. The relationship between  
11 transformational leadership behaviors, psychological, and training outcomes in elite military  
12 recruits. *Leadership Q*. 2010;21(1):20-32.  
13  
14 39. Carless S, Wearing A, Mann L. A short measure of transformational leadership. *JBP*.  
15 2000;14(3):389-405.  
16  
17 40. Podsakoff PM, MacKenzie SB, Bommer WH. Transformational Leader Behaviors and Substitutes  
18 for Leadership as Determinants of Employee Satisfaction, Commitment, Trust, and Organizational  
19 Citizenship Behaviors. *JOM*. 1996;22(2):259-98.  
20  
21 41. Antonakis J, Avolio BJ, Sivasubramaniam N. Context and leadership: an examination of the nine-  
22 factor full-range leadership theory using the Multifactor Leadership Questionnaire. *Leadership Q*.  
23 2003;14(3):261-95.  
24  
25 42. Larsson G. The Developmental Leadership Questionnaire (DLQ): some psychometric properties.  
26 *Scand J Psychol*. 2006;47(4):253-62.  
27  
28 43. Rafferty AE, Griffin MA. Dimensions of transformational leadership: Conceptual and empirical  
29 extensions. *Leadership Q*. 2004;15(3):329-54.  
30  
31 44. Tepper BJ, Percy PM. Structural Validity of the Multifactor Leadership Questionnaire. *Educ*  
32 *Psychol Meas*. 1994;54(3):734-44.  
33  
34 45. Hinkin TR, Tracey JB. The relevance of charisma for transformational leadership in stable  
35 organizations. *JOCM*. 1999;12(2):105-19  
36  
37 46. Clarke S. Safety leadership: A meta-analytic review of transformational and transactional  
38 leadership styles as antecedents of safety behaviours. *J Occup Organ Psychol*. 2013;86(1):22-49.  
39  
40 47. Garman AN, Davis-Lenane D, Corrigan PW. Factor structure of the transformational leadership  
41 model in human service teams. *J Organ Behav*. 2003;24(6):803-12.  
42  
43  
44  
45  
46  
47  
48  
49  
50  
51  
52  
53  
54  
55  
56  
57  
58  
59  
60

- 1  
2  
3 48. Skogstad A, Einarsen S, Torsheim T, Aasland MS, Hetland H. The destructiveness of laissez-faire  
4 leadership behavior. *J Occup Health Psychol.* 2007;12(1):80-92.  
5  
6  
7 49. Dóci E, Stouten J, Hofmans J. The cognitive-behavioral system of leadership: cognitive  
8 antecedents of active and passive leadership behaviors. *Front Psychol.* 2015;6:1344.  
9  
10  
11 50. Aarons GA, Ehrhart MG, Farahnak LR, Sklar M. Aligning leadership across systems and  
12 organizations to develop a strategic climate for evidence-based practice implementation. *Annu Rev*  
13 *Public Health.* 2014;35:255-74.  
14  
15  
16 51. Ehrhart MG, Aarons GA, Farahnak LR. Assessing the organizational context for EBP  
17 implementation: the development and validity testing of the Implementation Climate Scale (ICS).  
18 *Implement Sci.* 2014;9(1):157.  
19  
20  
21 52. Weiner BJ, Belden CM, Bergmire DM, Johnston M. The meaning and measurement of  
22 implementation climate. *Implement Sci.* 2011;6:78.  
23  
24  
25 53. Aarons GA, Sommerfeld DH. Leadership, innovation climate, and attitudes toward evidence-  
26 based practice during a statewide implementation. *J Am Acad Child Adolesc Psychiatry.*  
27 2012;51(4):423-31.  
28  
29  
30 54. Barling J, Loughlin C, Kelloway EK. Development and test of a model linking safety-specific  
31 transformational leadership and occupational safety. *J Appl Psychol.* 2002;87(3):488-96.  
32  
33  
34 55. Hong Y, Liao H, Hu J, Jiang K. Missing link in the service profit chain: a meta-analytic review of  
35 the antecedents, consequences, and moderators of service climate. *J Appl Psychol.*  
36 2013;98(2):237-67.  
37  
38  
39 56. von Thiele Schwarz U, Hasson H, Tafvelin S. Leadership training as an occupational health  
40 intervention: improved safety and sustained productivity. *Safety Sci.* 2016;81:35-45.  
41  
42  
43 57. Gurt J, Schwennen C, Elke G. Health-specific leadership: Is there an association between leader  
44 consideration for the health of employees and their strain and well-being? *Work Stress.*  
45 2011;25(2):108-27.  
46  
47  
48 58. Lewis R, Donaldson-Fielder E. The vital role of line managers in managing psychosocial risks. In:  
49 Biron C, Karanika-Murray M, Cooper C (Eds.), *Improving Organizational Interventions for Stress*  
50 *and Well-being: Addressing Process and Context.* Oxford: Routledge; 2012.  
51  
52  
53  
54  
55  
56  
57  
58  
59  
60

- 1  
2  
3 59. Lundmark R, Hasson H, von Thiele Schwarz U, Hasson D, Tafvelin S. Leading for change: line  
4 managers' influence on the outcomes of an occupational health intervention. *Work Stress*.  
5  
6 2017;31(3):276-96.  
7  
8  
9 60. Aarons GA, Ehrhart MG, Farahnak LR. The Implementation Leadership Scale (ILS): development  
10 of a brief measure of unit level implementation leadership. *Implement Sci*. 2014;9(1):45.  
11  
12 61. Randall R, Nielsen K, Tvedt SD. The development of five scales to measure employees'  
13 appraisals of organizational-level stress management interventions. *Work Stress*. 2009;23(1):1-23.  
14  
15 62. Richter A, von Thiele Schwarz U, Lornudd C, Lundmark R, Mosson R, Hasson H. iLead—a  
16 transformational leadership intervention to train healthcare managers' implementation leadership.  
17  
18  
19  
20  
21  
22  
23 63. Furr M. Scale Construction and Psychometrics for Social and Personality Psychology. London,  
24 United Kingdom: SAGE Publications Ltd; 2013.  
25  
26 64. Hasson H, von Thiele Schwarz U. How can research contribute to more useful evidence? Getting  
27 everyone on the same page: Co-created program logic (COP). In: Useful Evidence: Adherence and  
28 Adaptations (in Swedish: Användbar evidens: om följsamhet och anpassningar). Stockholm: Natur  
29 & Kultur; 2017. p. 210-211.  
30  
31  
32  
33 65. Lee A, Carpenter NC. Seeing eye to eye: A meta-analysis of self-other agreement of leadership.  
34  
35  
36  
37  
38  
39 66. Fleenor JW, Smither JW, Atwater LE, Braddy PW, Sturm RE. Self-other rating agreement in  
40 leadership: A review. *Leadership Q*. 2010;21(6):1005-34.  
41  
42 67. Dvir T, Eden D, Avolio BJ, Shamir B. Impact of Transformational Leadership on Follower  
43 Development and Performance: A Field Experiment. *Acad Manage J*. 2002;45(4):735-44.  
44  
45 68. Kelloway EK, Barling J, Helleur J. Enhancing transformational leadership: the roles of training  
46 and feedback. *LODJ*. 2000;21(3):145-9.  
47  
48  
49 69. Statistics Sweden, Theme Labor market, report 2015:4, *Trained health and social care workers –  
50 today and in the future*  
51  
52  
53 70. Bass BM, Yammarino FJ. Congruence of Self and Others' Leadership Ratings of Naval Officers  
54 for Understanding Successful Performance. *Appl Psychol*. 1991;40(4):437-454.  
55  
56  
57  
58  
59

- 1  
2  
3 71. Bass BM. Two Decades of Research and Development in Transformational Leadership. *EJWOP*.  
4 1999;8(1):9-32.  
5  
6  
7 72. Hoyle RH. Confirmatory factor analysis. *Handbook of applied multivariate statistics and*  
8 *mathematical modeling*. 2000:465-497.  
9  
10  
11 73. Byrne B. *Structural Equation Modeling with AMOS: Basic Concepts, Applications, and*  
12 *Programming*, 2<sup>nd</sup> ed. London: Routledge; 2010.  
13  
14  
15 74. Hu LT, Bentler PM. Cutoff criteria for fit indexes in covariance structure analysis: conventional  
16 criteria versus new alternatives. *Struc Equ Modeling*. 1999;6(1):1-55.  
17  
18  
19 75. Marsh HW, Hau K-T, Wen Z. In Search of Golden Rules: Comment on Hypothesis-Testing  
20 Approaches to Setting Cutoff Values for Fit Indexes and Dangers in Overgeneralizing Hu and  
21 Bentler's (1999) Findings. *Struct Equ Modeling*. 2004;11(3):320-341.  
22  
23  
24 76. Bollen KA. *Structural Equations with Latent Variables*. New York: John Wiley & Sons, Inc.;  
25 1989.  
26  
27  
28 77. Clinton-McHarg T, Yoong SL, Tzelepis F, Regan T, Fielding A, Skelton E, Kingsland M, Ooi JY,  
29 Wolfenden L. Psychometric properties of implementation measures for public health and  
30 community settings and mapping of constructs against the Consolidated Framework for  
31 Implementation Research: a systematic review. *Implement Sci*. 2016;11(1):148.  
32  
33  
34 78. Hox JJ. *Multilevel analysis: Techniques and applications*. 2 ed. New York: Routledge; 2010.  
35  
36  
37 79. Enders CK, Tofighi D. Centering predictor variables in cross-sectional multilevel models: a new  
38 look at an old issue. *Psychol Methods*. 2007;12(2):121-38.  
39  
40  
41 80. Hair JF TR, Anderson RE, Black W. *Multivariate data analysis*. London: Prentice-Hall; 1998.  
42  
43  
44 81. Aarons GA, Hurlburt M, Horwitz SM. Advancing a conceptual model of evidence-based practice  
45 implementation in public service sectors. *Adm Policy Ment Health*. 2011;38(1):4-23.  
46  
47  
48 82. Aarons GA. Transformational and transactional leadership: association with attitudes toward  
49 evidence-based practice. *Psychiatr Serv*. 2006;57(8):1162-9.  
50  
51  
52 83. Hunter ST, Bedell-Avers KE, Mumford MD. The typical leadership study: Assumptions,  
53 implications, and potential remedies. *Leadership Q*. 2007;18(5):435-46.  
54  
55  
56  
57  
58  
59  
60

- 1  
2  
3 84. Hinkin TR. A Brief Tutorial on the Development of Measures for Use in Survey Questionnaires.  
4  
5 *Organ Res Meth.* 1998;1(1):104-121.  
6  
7 85. Glasgow RE, Riley WT. Pragmatic measures: what they are and why we need them. *Am J Prev*  
8  
9 *Med.* 2013;45(2):237-243.  
10

11  
12  
13 **Figure title and legend section**  
14

15  
16 **Figure 1. Standardized factor loadings for the iLead scale.**  
17

18  
19 Notes: n=336; All confirmatory factor analysis factor loadings are for Model 1 ( $\chi^2_{(99)}=382.864^{**}$ , CFI=.935, TLI=.911,  
20 RMSEA=.059) with four first-order factors under one second-order factor for active implementation leadership, which is  
21 intercorrelated with a passive implementation leadership factor.  
22  
23  
24  
25  
26  
27  
28  
29  
30  
31  
32  
33  
34  
35  
36  
37  
38  
39  
40  
41  
42  
43  
44  
45  
46  
47  
48  
49  
50  
51  
52  
53  
54  
55  
56  
57  
58  
59  
60



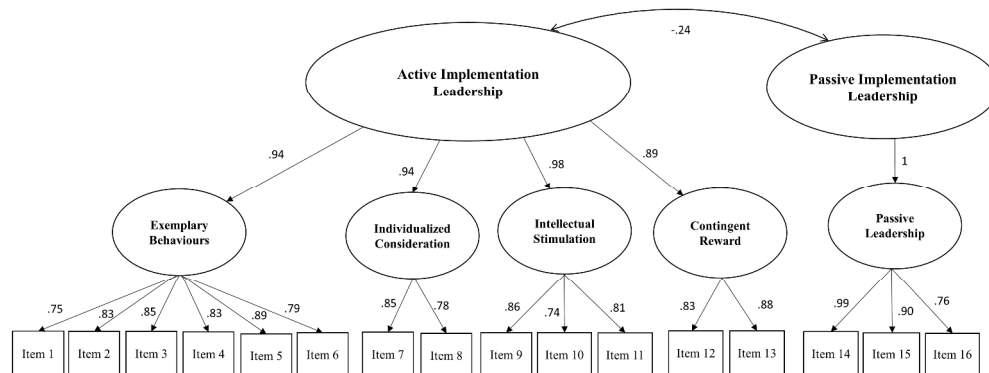

Figure 1. Standardized factor loadings for the iLead scale. † † † †

Notes: n=336; All confirmatory factor analysis factor loadings are for Model 1 ( $\chi^2(99)=382.864^{**}$ , CFI=.935, TLI=.911, RMSEA=.059) with four first-order factors under one second-order factor for active implementation leadership, which is intercorrelated with a passive implementation leadership factor.

338x190mm (300 x 300 DPI)

## Supplementary appendix 2: Bifactor analysis to partition the variance of the multidimensional scales

### Analysis procedure

The 13 indicators of active leadership were further analysed and modelled as a bifactor model using Mplus 7.2 using maximum-likelihood estimation.<sup>1-3</sup> Bifactor models can be used to partition the variance of multidimensional scales, differentiating the variance of each indicator into a common and unique component. The unique component can then further differentiate an indicator-specific and random error component. The bifactor model was composed of one general active leadership factor (i.e., all 13 indicators loading on the same factor) and four factors signifying the implementation leadership-specific sub-factors (i.e., *exemplary behaviour*, *individualized consideration*, *intellectual stimulation*, and *contingent reward*). Thus, all items loaded on two separate factors: the general active leadership factor and one implementation leadership-specific sub-factor. These five factors were uncorrelated with each other.<sup>1</sup> Based on the standardized factor loadings, omega ( $\omega$ ), omega hierarchical ( $\omega_H$ ), and omega subscale ( $\omega_S$ ) were calculated. Omega ( $\omega$ ) estimates the amount of variance in the observed scores that is due to a common factor variance (i.e., all sources of common variance); it corresponds to coefficient alpha for the total score. Omega hierarchical ( $\omega_H$ ) estimates the amount of total score variance that can be attributed to a single common factor (i.e., active implementation leadership), whereas omega subscale ( $\omega_S$ ) indicates the proportion of the reliable score variance of indicators measuring a specific factor (i.e., exemplary behaviour, individualized consideration, intellectual stimulation and contingent reward) after the general active implementation leadership factor is controlled for.<sup>1</sup> Hence, the Omega subscale ( $\omega_S$ ) is interpreted as the reliability of a specific sub-factor after the effect of other factors is controlled for. It is recommended that  $\omega_S$  be at least .50 so that the specific sub-factor is sufficiently systematic to be interpreted separately.<sup>1</sup>

### Findings

Results from the bifactor model specifying the different variance components are presented in Table 1, where the standardized factor loadings ( $\lambda$ ) for the common factor as well as the sub-factors are given.

The model fit ( $\chi^2=25,922^*$ ,  $df=55$ ,  $RMSEA=.102$ ,  $CFI=.945$ ,  $SRMR=.033$ ) indicates mixed results, with some values above the recommended cut-off points. However, when fitting bifactor models the traditional fit indices may not be applicable, due to the use of polytomous items.<sup>4</sup> Table 1 also presents the three omega ( $\omega$ ) coefficients, which are based on the standardized factor loadings ( $\lambda$ ) retrieved from the bifactor model (see formulas 3, 4, and 6 in Reise et al., 2010<sup>1</sup>). The general active implementation factor was reliable ( $\omega$  estimate of .96), which indicates 96% of the variance in the observed scores was due to all sources of the common variance. Hence, there is a common factor showing systematic differences between individuals in active implementation leadership. The general active implementation leadership factor alone accounted for 92% of the variance ( $\omega_H=0.92$ ), whereas the sub-dimensions of active implementation leadership show very low  $\omega_H$  coefficients. Hence, the sub-factors are systematic but account for very small parts of the total variance of active implementation leadership. This interpretation is also strengthened by  $\omega_S$  estimates, which indicate the proportion of reliable score variance of indicators measuring a specific sub-factor or perspective after the general active implementation leadership factor is controlled for. None of these  $\omega_S$  values is near the cut-off value of 0.50, recommended by Reise et al., 2010.<sup>1</sup>

**Table 1.** CFA bifactor model of active implementation leadership in the iLead scale.

|            | $\lambda$ Active implementation leadership | $\lambda$ Exemplary behaviours | $\lambda$ Individualized consideration | $\lambda$ Intellectual stimulation | $\lambda$ Contingent reward |
|------------|--------------------------------------------|--------------------------------|----------------------------------------|------------------------------------|-----------------------------|
| Item 1     | .67*                                       | .37*                           |                                        |                                    |                             |
| Item 2     | .79*                                       | .20*                           |                                        |                                    |                             |
| Item 3     | .76*                                       | .45*                           |                                        |                                    |                             |
| Item 4     | .85*                                       | .06                            |                                        |                                    |                             |
| Item 5     | .84*                                       | .27*                           |                                        |                                    |                             |
| Item 6     | .70*                                       | .46*                           |                                        |                                    |                             |
| Item 7     | .80*                                       |                                | .26*                                   |                                    |                             |
| Item 8     | .74*                                       |                                | .26*                                   |                                    |                             |
| Item 9     | .83*                                       |                                |                                        | .14*                               |                             |
| Item 10    | .76*                                       |                                |                                        | -.07                               |                             |
| Item 11    | .78*                                       |                                |                                        | .62*                               |                             |
| Item 12    | .75*                                       |                                |                                        |                                    | .39*                        |
| Item 13    | .79*                                       |                                |                                        |                                    | .37*                        |
| $\omega$   | .96                                        |                                |                                        |                                    |                             |
| $\omega_H$ | .92                                        | .02                            | .002                                   | .004                               | .005                        |
| $\omega_S$ |                                            | .12                            | .08                                    | .06                                | .16                         |

Model fit:  $\chi^2=25.922^*$ ;  $df=55$ ;  $RMSEA=.102$ ;  $CFI=.945$ ;  $SRMR=.033$

## References

1. Reise SP, Moore TM, Haviland MG. Bifactor models and rotations: exploring the extent to which multidimensional data yield univocal scale scores. *J Pers Assess.* 2010;92(6):544-59.
2. Bollen KA. *Structural Equations with Latent Variables.* New York: John Wiley & Sons, Inc.; 1989.
3. Gustafsson JE. Measurement from a hierarchical point of view. In: Braun HI, Jackson DN, Wiles DE, eds. *The Role of Constructs in Psychological and Educational Measurement.* London: Lawrence Erlbaum Associates; 2002. p. 73-95.
4. West SG, Taylor AB, Wu W. Model fit and model selection in structural equation modeling. In: Hoyle RH, editor. *Handbook of structural equation modeling.* New York: Guildford Press; 2012.
